1           ***Toxoplasma gondii* co-opts the unfolded protein response to enhance**  
2                           **migration and dissemination of infected host cells**

3  
4   Leonardo Augusto<sup>a,b</sup>, Jennifer Martynowicz<sup>c</sup>, Parth H. Amin<sup>a</sup>, Nada S. Alakhras<sup>a</sup>, Mark H.  
5   Kaplan<sup>c</sup>, Ronald C. Wek<sup>a\*</sup>, William J. Sullivan, Jr<sup>b,c\*</sup>

6  
7   <sup>a</sup>Department of Biochemistry & Molecular Biology, Indiana University School of Medicine,  
8   Indianapolis, Indiana, 46202.

9   <sup>b</sup>Department of Pharmacology & Toxicology, Indiana University School of Medicine,  
10   Indianapolis, Indiana, 46202.

11   <sup>c</sup>Department of Microbiology & Immunology, Indiana University School of Medicine,  
12   Indianapolis, Indiana, 46202.

13  
14   **Running title:** *Toxoplasma* infection induces host UPR and migration

15   \*Corresponding authors:

16   Ronald C. Wek  
17   Showalter Professor  
18   Indiana University School of Medicine  
19   635 Barnhill Drive  
20   MS 4067A  
21   Indianapolis, IN 46202  
22   (317) 274-0549; [rwek@iu.edu](mailto:rwek@iu.edu)

16   William J. Sullivan, Jr.  
17   Showalter Professor  
18   Indiana University School of Medicine  
19   635 Barnhill Drive  
20   MS A418C  
21   Indianapolis, IN 46202  
22   (317) 274-1573; [wjsulliv@iu.edu](mailto:wjsulliv@iu.edu)

26 **Abstract**

27 *Toxoplasma gondii* is an intracellular parasite that reconfigures its host cell to promote  
28 pathogenesis. One consequence of *Toxoplasma* parasitism is increased migratory activity of host  
29 cells, which facilitates dissemination. Here we show that *Toxoplasma* triggers the unfolded  
30 protein response (UPR) in host cells through calcium release from the endoplasmic reticulum  
31 (ER). We further found that host IRE1, an ER stress sensor protein activated during *Toxoplasma*  
32 infection, also plays a noncanonical role in actin remodeling by binding filamin A in infected  
33 cells. By inducing cytoskeletal remodeling via IRE1 oligomerization in host cells, *Toxoplasma*  
34 enhances host cell migration *in vitro* and dissemination of the parasite to host organs *in vivo*. Our  
35 study identifies novel mechanisms used by *Toxoplasma* to induce dissemination of infected cells,  
36 providing new insights into strategies for treatment of toxoplasmosis.

37

38 **Keywords:** *Toxoplasma*, parasites, UPR, IRE1, PERK, cell migration, filamin A, host-pathogen  
39 interactions

## 40 **Importance**

41           Cells that are infected with the parasite *Toxoplasma gondii* exhibit heightened migratory  
42 activity, which facilitates dissemination of the infection throughout the body. In this study, we  
43 identify a new mechanism used by *Toxoplasma* to hijack its host cell and increase its mobility.  
44 We further show that the ability of *Toxoplasma* to increase host cell migration does not involve  
45 the enzymatic activity of IRE1, but rather IRE1 engagement with actin cytoskeletal remodeling.  
46 Depletion of IRE1 from infected host cells reduces their migration in vitro and significantly  
47 hinders dissemination of *Toxoplasma* in vivo. Our findings reveal a new mechanism underlying  
48 host-pathogen interactions, demonstrating how host cells are co-opted to spread a persistent  
49 infection around the body.

50

## 51 **Introduction**

52 *Toxoplasma gondii* is an obligate intracellular parasite capable of infecting any nucleated  
53 cell in warm-blooded vertebrates. Recent studies have revealed a striking degree of host cell  
54 remodeling taking place in *Toxoplasma*-infected cells that serves to facilitate pathogenesis and  
55 transmission. In addition to secreted parasite effectors that modulate host cell gene expression,  
56 *Toxoplasma* infection can alter immune responses and enable dissemination to other host tissues  
57 [1]. Therein, *Toxoplasma* can differentiate from the replicative tachyzoites to the latent  
58 bradyzoite stage, enabling formation of tissue cysts that persist for the lifetime of the infected  
59 host [2].

60 Upon host cell invasion, *Toxoplasma* forms a parasitophorous vacuole (PV) that serves as  
61 a protective niche that can interface with the host cell cytoplasm to sequester nutrients [3].  
62 Curiously, *Toxoplasma* recruits the host endoplasmic reticulum (ER) to the PV via association  
63 between their respective membranes, although the reasons for this high affinity interaction are  
64 not yet understood [4, 5].

65 The ER is sensitive to the perturbations in protein homeostasis through a stress-sensing  
66 pathway known as the unfolded protein response (UPR). Three ER transmembrane proteins,  
67 IRE1, ATF6, and PERK operate as sensors that activate the UPR, leading to changes in gene  
68 expression that restore and expand the processing capacity of the organelle [6-8]. IRE1 (ERN1)  
69 is a protein kinase and endoribonuclease that facilitates cytosolic splicing of *XBPI* (*XBPI*s)  
70 mRNA, thereby enhancing expression of the *XBPI*s isoform, which induces transcription of  
71 genes involved in ER-associated protein degradation (ERAD), lipid synthesis, and protein  
72 folding [7, 8]. In response to ER stress, ATF6 transits from the ER to the Golgi apparatus where  
73 it is cleaved, releasing an N-terminal cytosolic fragment (ATF6-N) that enters the nucleus and

74 activates UPR-target genes involved in protein folding and transport [6, 9]. PERK (EIF2AK3) is  
75 the third UPR sensor, which phosphorylates eIF2 $\alpha$  to direct translational and transcriptional  
76 modes of gene expression that regulate ER processing of proteins, metabolism, and the oxidation  
77 status of cells [6, 10]. While the three ER stress sensory proteins function in parallel, there is  
78 cross-regulation that serves to coordinate the timing and magnitude of the UPR. For example,  
79 PERK was reported to induce expression of RPAP2, which serves to dephosphorylate and  
80 repress IRE1, thereby providing a means for the cell to abort failed ER-stress adaptation and  
81 trigger apoptosis [11].

82         In addition to its role in the UPR, IRE1 was recently shown to modulate cytoskeletal  
83 remodeling and cell migration through direct interactions with the actin crosslinking factor  
84 filamin A [12]. The role of IRE1 in cytoskeletal remodeling is enhanced by pharmacological  
85 induction of ER stress, but occurs independent of IRE1 protein kinase and endoribonuclease  
86 activities [12]; rather, IRE1 serves as a scaffolding protein for filamin A to orchestrate changes  
87 in cellular motility. This is noteworthy because *Toxoplasma* stimulates host cell migration,  
88 turning its host cell into a “Trojan Horse” that can ferry parasites throughout the body [13].  
89 Given the recruitment of host ER to the PV, we postulated that migratory activities mediated by  
90 IRE1 function in parasite dissemination. In the present study, we uncover a new mechanism by  
91 which *Toxoplasma* alters host ER homeostasis to produce hypermigratory activity in infected  
92 host cells. We show that during the course of *Toxoplasma* infection, the three UPR sensory  
93 proteins in the host cells are activated by a process involving calcium release from the ER,  
94 leading to IRE1 oligomerization, association with filamin A, and enhanced cell migration.  
95 Importantly, the IRE1-associated migration is a crucial determinant for successful dissemination  
96 of toxoplasmosis in a mouse model of infection.

## 97 **Results**

### 98 **Induction of the UPR in *Toxoplasma*-infected host cells**

99           It is currently unclear why intracellular tachyzoites recruit host ER to the parasite PV. To  
100 address whether *Toxoplasma* perturbs host ER homeostasis, we infected mouse embryonic  
101 fibroblast (MEF) cells with RH strain parasites and measured three primary markers of the host  
102 UPR over a 36-hour time course. Within 12 h of infection, *Toxoplasma* increased activation of  
103 PERK as measured by its self-phosphorylation (PERK-P), induced expression of ATF6 and  
104 formation of its cleavage product ATF6-N, and increased levels of the IRE1-derived spliced  
105 variant of XBP1 (XBP1s) (**Fig. 1A**). It is noteworthy that whereas expression of ATF6-N and  
106 XBP1s were transient, with increased amounts of the proteins appearing between 12 to 20 h post-  
107 infection (hpi), PERK-P increased throughout the 36 h of infection (**Fig. 1A**). These results  
108 indicate that *Toxoplasma* infection causes ER stress that activates each of the sensory proteins of  
109 the UPR with some differences in the duration of their induction.

110           Activation of IRE1 involves oligomerization that can be visualized by a pattern of  
111 punctate spots by IFA [14-16]. We expressed EGFP-tagged IRE1 in MEF cells that were deleted  
112 for the endogenous *IRE1* gene by CRISPR/Cas9 genome editing (**Fig. S1A-C**); upon  
113 *Toxoplasma* infection, we observed formation of IRE1 foci that is consistent with reported IRE1  
114 activation by oligomerization (**Fig. 1B**) [15, 16]. Furthermore, expression of *XBP1s* mRNA, and  
115 its downstream target genes involved in ERAD and protein folding, were induced upon  
116 *Toxoplasma* infection of wild-type (WT) MEF cells (**Fig. 1C**). These results indicate that IRE1  
117 activation and signaling occur in response to *Toxoplasma* infection.

118           To further study the timing of UPR induction and potential cross-regulation between the  
119 UPR sensors in infected cells, we measured *XBP1s* mRNA levels by RT-qPCR in WT, *IRE1*<sup>-/-</sup>,

120 or *PERK*<sup>-/-</sup> MEF cells. In WT cells, levels of *XBPIs* mRNA rose sharply until 18 hpi (**Fig. 1D**),  
121 consistent with the increase in *XBPIs* protein (**Fig. 1A**). As expected, *XBPIs* mRNA was not  
122 detected in infected *IRE1*<sup>-/-</sup> cells (**Fig. 1D**). By comparison, there was induced *XBPIs* mRNA  
123 that was sustained during 36 h of *Toxoplasma* infection in *PERK*<sup>-/-</sup> cells, indicating that without  
124 PERK, IRE1 continues to facilitate *XBPIs* expression (**Fig. 1D**). These results are consistent  
125 with the idea that PERK governs IRE1 activity as previously reported [11] and suggests that in  
126 infected WT cells, PERK operates to attenuate the response of IRE1 after 18 hpi.

127

### 128 **IRE1 affects calcium release from ER in *Toxoplasma*-infected cells.**

129 Protein folding in the ER is highly sensitive to the concentration of calcium, which is  
130 released from the organelle by ryanodine receptors (RyR) and inositol 1,4,5-triphosphate (IP<sub>3</sub>)-  
131 receptors (IP<sub>3</sub>R) [17]. The ER is a major reservoir of calcium; disruptions of calcium  
132 homeostasis can lead to unfolded proteins and initiation of the UPR [17]. To determine whether  
133 calcium content is altered in the host ER during *Toxoplasma* infection, we first measured  
134 cytosolic calcium in infected MEF cells. Over an 18-hour period, *Toxoplasma* infection induced  
135 a steady increase in host cell cytosolic calcium levels (**Fig. 2A, Fig. S2A**). Basal calcium levels  
136 in the cytosol of *IRE1*<sup>-/-</sup> cells were lower compared to WT cells, as previously reported [18], with  
137 some increase upon parasite infection (**Fig. 2A, Fig. S2A**). To assess the mode of calcium  
138 release from the host ER during infection, we monitored calcium transport using Fluo-4AM in  
139 the presence of antagonists of RyR or IP<sub>3</sub>R. The cytosolic calcium levels were lower in infected  
140 cells treated with either antagonist, with the most robust calcium reduction occurring with  
141 inhibition of IP<sub>3</sub>R (**Fig. 2B**). We further addressed the contribution of RyR and IP<sub>3</sub>R to calcium  
142 release by adding increasing doses of caffeine and IP<sub>3</sub>, agonists of RyR and IP<sub>3</sub>R receptor

143 activity [19], respectively, to WT and *IRE1*<sup>-/-</sup> cells infected with *Toxoplasma* for 18 h and  
144 incubated with Mag-Fluo-4. To compare calcium release between RyR and IP<sub>3</sub>R in WT and  
145 *IRE1*<sup>-/-</sup> cells, the fluorescence values were represented as the percentage of calcium release and  
146 the respective start points were normalized to untreated WT and *IRE1*<sup>-/-</sup> cells, respectively. The  
147 RyR agonist enhanced calcium to similar levels in infected WT or *IRE1*<sup>-/-</sup> cells (**Fig. 2C**). By  
148 comparison, the agonist IP<sub>3</sub> induced appreciable calcium release only in infected WT cells (**Fig.**  
149 **2D**), indicating a role for IRE1 in regulating IP<sub>3</sub>R activity as previous reported [18].  
150 Surprisingly, the percentage of calcium release was higher when IP<sub>3</sub>R was stimulated compared  
151 to RyR, demonstrating that *Toxoplasma* infection differentially alters RyR and IP<sub>3</sub>R activities.  
152 Collectively, these results suggest that *Toxoplasma* infection induces significant calcium release  
153 from the host ER by processes involving both IP<sub>3</sub>R and RyR; this calcium release is influenced  
154 by IRE1 and is a likely contributor to the activation of the host ER-stress sensor proteins seen in  
155 Figure 1A.

156

### 157 **IRE1 activation induces cell migration in infected cells**

158 *Toxoplasma* triggers rapid morphological changes in host cells, including disappearance  
159 of podosome structures and appearance of lamellipodia [20]. IRE1 has recently been shown to  
160 have noncanonical functions in actin cytoskeletal remodeling by directly binding to filamin A  
161 [12]. To address whether activation of IRE1 by *Toxoplasma* infection enhances host cell  
162 migration, we quantified the number of lamellipodia per infected cell normalized to uninfected  
163 cells (**Fig. 3A, Fig. S3A**). At 18 hpi, *Toxoplasma* infection increased the number of lamellipodia  
164 in WT cells and these structures were significantly diminished in IRE1-deficient cells (**Fig. 3A**).  
165 By comparison, there were greater numbers of lamellipodia in PERK-deficient cells or those



166 treated with a PERK inhibitor, consistent with the idea that PERK is a negative regulator of IRE1  
167 (**Fig. 3A**). Of interest, treatment with inhibitors of IRE1, namely 4 $\mu$ 8c, which interferes with  
168 endoribonuclease activity, and KIRA6, which blocks IRE1 protein kinase activity, did not  
169 change the number of lamellipodia compared infected cells treated with vehicle (**Fig. 3A**). These  
170 results indicate that IRE1 can control migration of *Toxoplasma* infected cells independent of its  
171 known enzymatic activities.

172 The functions of filamin A in cytoskeleton dynamics and cell migration is dependent on  
173 phosphorylation of serine 2,152 (S2152) [21]. We detected a sharp increase in filamin A  
174 phosphorylation in MEF cells infected with *Toxoplasma* for 18 h, which was not observed in  
175 host cells lacking IRE1 (**Fig. 3B**). To address whether there is an association between IRE1 and  
176 filamin A, we expressed myc-tagged filamin A (myc-FLNA) in WT MEF cells. Following 18 h  
177 of *Toxoplasma* infection, we then performed an immunoprecipitation (IP) of the tagged filamin  
178 A, followed by immunoblot measurements of associated IRE1. There was enhanced association  
179 of IRE1 with filamin A in cells infected with the parasite compared to those uninfected (**Fig.**  
180 **3C**).

181 Next, we measured changes in host cell transmigration upon parasite infection and  
182 determined that there was a 2-fold increase in migration of WT MEF cells upon infection with  
183 *Toxoplasma* (**Fig. 3D, Fig. S3B**). Increased host cell migration was observed regardless of  
184 whether the cells were infected with type I RH or type II ME49 strain parasites (**Fig. S3C**). In  
185 contrast, parasite infection did not induce migration of cells lacking IRE1. Levels of migration in  
186 infected WT MEF cells treated with the IRE1 enzymatic inhibitors, KIRA6 or 4 $\mu$ 8c, or an ATF6  
187 inhibitor (Ceapin-A7), were not significantly changed compared to untreated infected MEF cells,  
188 nor were they altered in cells lacking the downstream IRE1 target XBP1 (**Fig. 3D**). Notably,

189 *Toxoplasma*-induced migration of PERK-deficient cells or WT treated with PERK inhibitor was  
190 increased >2.5-fold upon parasite infection compared to infected cells with functional PERK  
191 (**Fig. 3D**). These results suggest that IRE1 plays a critical role in inducing migration of  
192 *Toxoplasma*-infected cells and that this migration is independent of the protein kinase and  
193 endoribonuclease activities of IRE1 and its downstream target *XBPI*. Furthermore, PERK is  
194 suggested to dampen both IRE1 functions in *XBPI* mRNA splicing and cell migration, which are  
195 induced upon *Toxoplasma* infection.

196

### 197 **ER stress induces cell migration by mechanisms involving IRE1 oligomerization**

198 To better understand the mechanisms by which IRE1 enhances host cell migration in  
199 response to *Toxoplasma* infection, we rescued the *IRE1*<sup>-/-</sup> cells by expressing WT or defined  
200 mutant versions of IRE1 (**Fig. 3E**). Equal amounts of the IRE1 proteins were expressed as  
201 judged by immunoblot and immunofluorescence analyses (**Fig. S4A and B**). As expected, *ire1*-  
202 *wt* rescued the migration capacity of infected cells (**Fig. 3E**). Expression of IRE1 defective in  
203 kinase (*ire1-kD*) or endoribonuclease (*ire1-eD*) activities still rescued the migration phenotype,  
204 further supporting the idea that these activities are dispensable for induced cell migration in  
205 response to parasite infection (**Fig. 3E**). In contrast, cells expressing IRE1 with mutations in the  
206 oligomerization domain (*ire1-oD*) were deficient in *Toxoplasma*-induced migration (**Fig. 3E**).  
207 Furthermore, a truncated c-terminal version of IRE1 (*ire1-Δ965*) lacking the proline-rich  
208 carboxy-terminal segment of IRE1 that binds filamin A [12] was also impaired in cell migration  
209 following infection (**Fig. 3E**). As anticipated, only *ire1-wt* and *ire1-Δ965* showed induction of  
210 spliced *XBPI* mRNA upon pharmacological induction of ER stress (**Fig. S4C**). These results  
211 suggest that *Toxoplasma* infection induces IRE1 oligomerization (see also Fig. 1B), and that the

212 hypermigratory behavior of infected host cells is reliant on both the oligomerization domain and  
213 the portion of IRE1 that interacts with filamin A.

214         Since we found that *Toxoplasma* induces calcium release from the host ER upon  
215 infection, we examined the importance of calcium release in host cell migration induced by  
216 *Toxoplasma*. We treated infected cells with RyR and IP<sub>3</sub>R receptor blockers or activators during  
217 the migration assay: ryanodine (Ry) or xestospongine-C (XeC) were used to inhibit RyR and IP<sub>3</sub>R  
218 receptors, respectively; caffeine or IP<sub>3</sub> were used to activate RyR and IP<sub>3</sub>R receptors,  
219 respectively. When infected cells were treated with the RyR and IP<sub>3</sub>R activators (releasing  
220 calcium from ER into the cytosol), the migration levels increased compared to cells not treated  
221 with these agents. By contrast, addition of the IP<sub>3</sub>R inhibitor significantly decreased migration of  
222 the infected cells (**Fig. 3F**), consistent with IP<sub>3</sub>R being the major calcium release receptor  
223 involved in triggering the host UPR following *Toxoplasma* infection (**Fig. 2B**). These results  
224 support the idea that calcium release from the host ER contributes to IRE1 activation and its  
225 subsequent role in augmenting migration in response to infection.

226

### 227 **IRE1 controls host cell migration in infected immune cells *in vitro*.**

228         *Toxoplasma* makes use of immune cells as a “Trojan Horse” to disseminate to distal  
229 organs and tissues throughout the body of the infected host [13]. To address whether *Toxoplasma*  
230 is targeting IRE1 in immune cells to enhance their migration and facilitate dissemination, we  
231 infected bone marrow-derived dendritic cells (DCs) with *Toxoplasma*. Levels of *XBPIs* mRNA  
232 were sharply increased upon *Toxoplasma* infection in DCs (**Fig. 4A**), consistent with the idea  
233 that the parasite infection activated IRE1 in this cell type. Next, we used CRISPR/Cas9 and two  
234 distinct sgRNAs (sgRNA 1 and 2) to disrupt IRE1 in DCs (**Fig. S5A**). The sgRNA1 and sgRNA2

235 decreased *IRE1* mRNA levels by 66% and 93%, respectively (**Fig. 4B**). Each gRNA also led to a  
236 corresponding reduction in IRE1 protein in DCs, with sgRNA2 leading to no detectable IRE1  
237 (**Fig. 4C**). IRE1-depleted DCs (*ire1* (-)) did not exhibit decreased cell viability compared to WT,  
238 nor did they show any difference in infectivity with *Toxoplasma* (**Fig. 4D, Fig. S5B**). However,  
239 loss of IRE1 in DCs significantly lowered the transmigratory capacity following infection with  
240 either Type I or Type II strains of *Toxoplasma* (**Fig. 4E, Fig. S3D**). To determine whether IP<sub>3</sub>R  
241 plays a role in the migration of infected DCs, we carried out the migration assay in the presence  
242 of XeC. Inhibition of IP<sub>3</sub>R resulted in a loss of host cell migration following 18 h of *Toxoplasma*  
243 infection (**Fig. 4F**), further supporting the importance of calcium homeostasis in the ER for  
244 migration of *Toxoplasma* infected cells. To test whether IRE1 controls the migration of infected  
245 macrophages as well, we used CRISPR/Cas9 to deplete IRE1 in J774.1 macrophages (**Fig. 4G**  
246 **and H**). As observed for DCs, the loss of IRE1 significantly reduced the ability of infected  
247 macrophages to migrate (**Fig. 4I**).

248

#### 249 **IRE1 facilitates dissemination of *Toxoplasma* in vivo**

250 To determine the importance of IRE1 in the migration of infected DCs *in vivo*, we  
251 inoculated C57BL/6 mice intraperitoneally (i.p.) with infected WT or infected *ire1* (-) DCs and  
252 measured parasite burden in the spleen by PCR at the designated time intervals over 3 days.  
253 Depletion of IRE1 in the DCs by CRISPR/Cas9 was confirmed by RT-qPCR and immunoblot  
254 analyses (**Fig. 5A and B**). Moreover, we ascertained that there was no significant difference in  
255 parasite infection of WT and IRE1-depleted DCs (**Fig. 5C**). *Toxoplasma* was first detected in the  
256 spleens of mice 12 h following i.p. inoculation with infected WT DCs, increasing at each time  
257 point over the 3-day period (**Fig. 5D**). In striking contrast, appreciable levels of *Toxoplasma*

258 dissemination of infected IRE1-depleted DCs to the spleen were not detected until 3 days  
259 following inoculation of the mice (**Fig. 5D**). Even at the 3-day time point, the loss of IRE1 from  
260 DCs produced lowered levels of parasitemia in the spleen that were similar to those measured at  
261 12 h of infected WT DCs. We also measured the *Toxoplasma* dissemination to the brain at 3  
262 days, finding 200-fold fewer parasites when infected IRE1-depleted DCs were inoculated into  
263 the mice (**Fig. 5E**). Mice inoculated with infected DCs lacking IRE1 survived significantly  
264 longer than mice receiving infected WT DCs (**Fig. 5F**). These results demonstrate a novel role  
265 for host IRE1 in parasite pathogenesis, as IRE1 is crucial for the migration of immune cells  
266 being co-opted as “Trojan Horses” for parasite dissemination.

267

## 268 **Discussion**

269 Obligate intracellular pathogens create a niche inside of their host cell that allows for  
270 parasite protection, nutrient acquisition, and the controlled release of pathogen effectors that  
271 promote infection and dissemination. *Toxoplasma* tachyzoites reside inside of a nonfusogenic  
272 parasitophorous vacuole (PV) that forms intimate contacts with host organelles and vesicles,  
273 including the ER and mitochondria [4, 5]. It is suggested that the recruitment of host organelles  
274 to the PV allows *Toxoplasma* to control critical host cell operations, including antigen  
275 presentation, nutrient production, and suppression of apoptosis [5]. In this study, we addressed  
276 consequences of the *Toxoplasma*-ER engagement on parasite infection and dissemination in the  
277 host. As illustrated in a model presented in **Fig. 5G**, we showed that *Toxoplasma* infection  
278 activates each of the UPR sensor proteins, including IRE1, via ER stress that results at least in  
279 part from release of calcium from the organelle, primarily through IP<sub>3</sub>R. In addition to its role in  
280 the UPR, IRE1 has recently been shown to have noncanonical functions associated with the

281 remodeling of the cytoskeleton through direct interactions with the actin crosslinking factor  
282 filamin A [12]. We showed that *Toxoplasma* alters the morphology of its host cells through  
283 IRE1-filamin A interactions, which directs cytoskeletal remodeling that contributes to a  
284 hypermigratory phenotype that facilitated dissemination of the parasite into multiple organs of  
285 the infection host. The role of IRE1 in *Toxoplasma*-induced hypermigration is not reliant on its  
286 protein kinase or endoribonuclease activities that are central for classical UPR signaling; rather,  
287 it is IRE1 oligomerization and the C-terminal residues required for filamin A association that  
288 prove to be important.

289         After oral infection, *Toxoplasma* rapidly spreads from the lamina propria to distal organs  
290 using host immune cells as a vehicle for dissemination [22]. Given our discovery that IRE1 is  
291 mobilized by *Toxoplasma* to enhance hypermigratory behavior in host cells, we tested whether  
292 IRE1 is crucial to *in vivo* dissemination in a mouse model of infection. We found that depletion  
293 of IRE1 in immune cells sharply decreases the number of parasites in the spleen or brain of  
294 infected mice (**Fig. 5E**). These results reveal a number of potential new targets for drug  
295 development aimed at thwarted spread of infection in the body.

296         It is noteworthy that other mechanisms have been suggested to contribute to the cell  
297 hypermotility upon *Toxoplasma* infection. For example, parasite effector protein TgWIP, TIMP-  
298 1, and GABAergic signaling were reported to signal hypermigration of certain infected host cells  
299 [23-26]. A key question for future studies is how these different mechanisms are coordinated to  
300 induce hypermigratory activity in *Toxoplasma*-infected host cells.

301

302

303

## 304 **Methods**

305 **Host cell and parasite culture.** MEF (mouse embryonic fibroblast) cells were cultured in  
306 Dulbecco's modification of Eagle's medium (DMEM) supplemented with 10% heat-inactivated  
307 fetal bovine serum (FBS) (Gibco/Invitrogen) and penicillin/streptomycin at 37°C with 5% CO<sub>2</sub>.  
308 *PERK*<sup>-/-</sup> cells were previously reported [27] and IRE1-deficient MEF cells were engineered by  
309 CRISPR as described below. Host cells were seeded at a density of 2x10<sup>5</sup> cells/well in a 6 well  
310 plate and cultured for 18 h. Infection was performed using multiplicity of infection (MOI) of 3  
311 with Type I or II (RH or ME49) strain *Toxoplasma* parasites, as indicated, for 18 h. The infected  
312 cells were cultured in DMEM medium supplemented with 10% heat-inactivated fetal bovine  
313 serum (FBS) (Gibco/Invitrogen) and penicillin/streptomycin at 37°C with 5% CO<sub>2</sub>. Cultures of  
314 DCs and J774.1 macrophages were cultivated in Roswell Park Memorial Institute (RPMI)  
315 supplemented with 10% heat-inactivated fetal bovine serum (FBS) (Gibco/Invitrogen) and  
316 penicillin/streptomycin at 37°C with 5% CO<sub>2</sub> and infected as described above.

317

318 **Generation of *IRE1* knockout cells.** Disruption of the *IRE1* gene in MEF cells was carried out  
319 using the CRISPR/Cas9 method [28]. Two distinct sgRNAs designed using DESKGEN™ tool  
320 (g1-TGGACACGGAGCTGACT and g2-ACACGGAGCTGACTGGG) were examined  
321 individually. The sgRNAs were prepared using the EnGen™ sgRNA Synthesis Kit (New  
322 England BioLabs), along with a sg control (g-control- CATCCTCGGCACCGTCACCC). The  
323 sgRNAs were then associated with EnGen® Spy Cas9 NLS protein (New England BioLabs) at  
324 room temperature for 20 min. MEF cells were then transfected with the bound sgRNA/Cas9  
325 protein using the Lipofectamine CRISPRMAX Cas9 Transfection Reagent (Thermo-Fisher  
326 Scientific). After culturing the transfected cells for 48 h, 100 cells were plated in 10 mm tissue-

327 culture dishes for cloning. Cloned *IRE1*<sup>-/-</sup> MEF cells were validated by RT-qPCR using specific  
328 primers and by immunoblot using IRE1-specific antibody (Abcam-ab37073). *IRE1*<sup>-/-</sup> cells were  
329 complemented with pcDNA3-derived vectors containing WT or the indicated mutant versions of  
330 *IRE1*. Briefly, the mouse cDNA sequence of *IRE1* from MEF cells was inserted into pcDNA3-  
331 EGFP plasmid (Addgene #13031), resulting in fusion proteins with the EGFP fused to the  
332 carboxy terminus of IRE1. Mutations in *IRE1* include changes inactivating the critical functions,  
333 including *kD* (kinase domain- K599A), *eD* (endoribonuclease domain- P830L), *oD*  
334 (oligomerization domain- D123P) or *c-terminal* (truncated c-terminal  $\Delta$ 965), were carried out  
335 using specific primers (**Supplemental Table 1**) and the Q5 Site-Directed Mutagenesis Kit (New  
336 England Biolabs). After sequence verification, the plasmids were transfected into *IRE1*<sup>-/-</sup> cells  
337 using FuGENE 6 Transfection Reagent. Rescued WT and mutant IRE1 protein expression were  
338 confirmed by immunoblot and immunofluorescence microscopy (**Fig. S4A and B**).

339 To generate bone marrow-derived dendritic cells (DCs),  $10 \times 10^6$  bone marrow cells were  
340 isolated and cultured in 6-well plate in 3 ml of complete medium (RPMI 1640 medium  
341 supplemented with 10% fetal bovine serum, penicillin, streptomycin, glutamine, 2-  
342 mercaptoethanol, 20 ng/ml granulocytes-macrophage colony-stimulating factor (GM-CSF) and  
343 5ng/ml Interleukin 4 (IL-4) (both from Peprotech)) for 7 days. Half of the medium was replaced  
344 every two days with medium supplemented with GM-CSF and IL-4, as previously described  
345 [29]. DCs or J774.1 macrophages were transfected with IRE1-sgRNA-1 or 2, associated with  
346 EnGen™ Spy Cas9 NLS protein (New England BioLabs), using the 4D-Nucleofector™ System  
347 (Lonza) in combination with the P3 Primary Cell 4D-Nucleofector™ X Kit. After 48 h, the *IRE1*  
348 mRNA and protein levels were measured by RT-qPCR and immunoblot, respectively. Viability  
349 of DCs was examined by trypan blue staining.



350  
351 **Measurement of mRNA levels.** Cells were first infected with *Toxoplasma* for 2 h, washed with  
352 phosphate-buffered saline (PBS), and then cultured in DMEM at the indicated time points. RNA  
353 was isolated from cells using TRIzol LS Reagent (Invitrogen™), the cDNA was then generated  
354 using Omniscript (Qiagen) and RT-qPCR was performed using SYBR® Green Real-Time PCR  
355 Master Mixes (Invitrogen™) and the StepOnePlus Real System (Applied Biosystems™).  
356 Oligonucleotide primers used to measure each target mRNA is listed in the supplementary Table  
357 1. Relative levels of target mRNAs from the uninfected samples were adjusted to 1 and served as  
358 the basal control value. Values of each time point were normalized to mock infection. Each  
359 experiment was performed three times, each with three technical replicates.

360  
361 **Immunoblot analyses.** Cells were infected with *Toxoplasma* for 2 h, washed with PBS, then  
362 cultured in DMEM for the indicated time points. The infected cells were harvested in RIPA  
363 buffer solution supplemented with cOmplete™ and EDTA-free Protease Inhibitor Cocktail  
364 (Roche). Protein quantification was performed using the Bradford Reagent (Sigma-Aldrich).  
365 Equal amounts of protein lysates were separated by SDS-PAGE and proteins were transferred to  
366 nitrocellulose filters. Immunoblot analyses were using primary antibodies- IRE1 (Abcam-  
367 ab37073), XBP1s (Cell Signaling #D2C1F), ATF6 [30], GAPDH (Abcam-ab9485), PERK (Cell  
368 Signaling #3192), followed by Amersham ECL HRP-Conjugated Antibodies secondary  
369 antibody. These antibodies and additional reagents used in the study are listed in the  
370 supplementary Table 2. Proteins were visualized in the immunoblots were visualized using  
371 FluorChem M- Multiplex fluorescence (Protein Simple). Immunoblot analyses were carried out  
372 for three independent experiments.

373

374 **Calcium measurement assay.** *Toxoplasma*-infected MEF cells were washed twice with buffer  
375 A solution supplemented with glucose (120 mM NaCl, 20 mM HEPES (pH 7.4), 4.7 mM KCl,  
376 1.2 mM NaH<sub>2</sub>PO<sub>4</sub>, 1.2 mM MgSO<sub>4</sub>, 1.2 mM CaCl<sub>2</sub> and 10 mM glucose) [31], and then a final  
377 concentration of 5 μM of Fluo-4, AM (Thermo Fisher Scientific, F14201) was added for 15 min  
378 at 37°C. Prior to the calcium measurements, cells were washed once with buffer A solution  
379 supplemented with glucose. A Synergy (BioTek) plate reader was used to monitor the Fluo-4  
380 AM fluorescence at 488-nm excitation and 524-nm emission wavelengths. Values derived from  
381 infected cells ( $\Delta F$ ) were divided by the resting intracellular calcium (F<sub>0</sub>),  $\Delta F/F_0$ , and the values  
382 of each time point were normalized to mock-infected cells. In parallel, live infected cells were  
383 imaged by microscopy at the same exposure and a heat map was generated using ImageJ  
384 software. To determine the activity of RyR and IP<sub>3</sub>R receptors, infected cells were incubated  
385 with 5 μM Mag-Fluo-4, a low-affinity Ca<sup>2+</sup> indicator, then permeabilized with 10 μg/ml of  
386 saponin followed by incubation with 1.5 mM ATP to maintain Mag-Fluo-4 in the ER [19] (**Fig.**  
387 **S2B**). Infected cells were treated with the indicated concentrations of caffeine (RyR, 0-200 mM)  
388 or IP<sub>3</sub> (IP<sub>3</sub>R, 0-3 μM) (Sigma-Aldrich). A Synergy (BioTek) plate reader was used to monitor the  
389 Mag-Fluo-4 fluorescence at 490-nm excitation and 525-nm emission wavelengths [19]. Values  
390 were normalized to mock-infected cells.

391

392 **Immunofluorescence assay.** Cultured cells were infected with *Toxoplasma* for 18 h, then fixed  
393 with 2.5% paraformaldehyde for 20 min and blocked with PBS supplemented with 2% BSA.  
394 Cells were permeabilized in blocking solution containing 0.01% Triton X-100 for 30 min, and  
395 incubated with primary antibody (SAG1-p30, Invitrogen) for 1 h. Secondary goat anti-rabbit

396 Alexa-fluor 488 (Invitrogen) was applied for 1 h in the presence of Rhodamine Phalloidin  
397 (Thermo Fisher Scientific) followed by Prolong Gold antifade reagent (Invitrogen). DAPI was  
398 used to visualize host cells and parasite nuclei (Vector Labs). Images were acquired with a Leica  
399 inverted DMI6000B microscope with 63x oil immersion objective and analyzed in ImageJ.  
400 Alternatively, *IRE1*<sup>-/-</sup> cells were transfected with pcDNA3 encoding IRE1 fused with EGFP at  
401 the carboxy terminus and infected with *Toxoplasma* for 18h (MOI: 3); the cells were then fixed  
402 and imaged as described above.

403  
404 **Immunoprecipitation assay.** The mouse cDNA sequence of filamin A from MEF cells was  
405 amplified and cloned into pcDNA3-myc plasmid (Addgene). The resulting plasmid pcDNA3-  
406 myc-FLNA was transiently transfected in the MEF cells and then the transfected cells were  
407 infected with *Toxoplasma* for 18 h (MOI: 3). Cell lysates were prepared using IP-lysis solution  
408 (0.5% NP-40, 250 mM NaCl, 30 mM Tris, 0.5% glycerol, pH 7.4, 250 mM phenylmethylsulfonyl  
409 fluoride (PMSF) supplemented with cOmplete™ and EDTA-free Protease Inhibitor Cocktail  
410 (Roche)). To immunoprecipitate myc-tagged filamin A (myc-filamin A), equal amounts of  
411 protein lysates were incubated with IgG Magnetic beads (Pierce) for 2 h, then mixed with anti-  
412 myc Magnetic beads (Pierce) overnight at 4 °C with rotation. Proteins bound to the beads were  
413 subsequently washed four times with IP-lysis solution at 4°C and then once with IP-lysis  
414 solution supplemented with 500 mM NaCl. Protein complexes were eluted at 95°C for 5 min in  
415 loading buffer solution and then separated by SDS-PAGE, followed by immunoblot analyses  
416 using specific antibodies to IRE1 (Abcam-ab37073) or Myc (Cell Signaling #2276).

417

418 **Cell migration assay.** Cells were infected with *Toxoplasma* MOI 3 for 18 h and then trypsinized  
419 and counted using a hemocytometer;  $2 \times 10^4$  cells were resuspended in serum-free medium and  
420 applied to the top of a membrane coated with collagen I (rat-tail) (Gibco- A1048301).  
421 Transmigration assays were carried out using a Corning Transwell Costar apparatus (6.5 mm  
422 diameter and 8  $\mu$ m pore size) as described [32]. After 18 h for MEF and 6 h for DCs and  
423 macrophages, the medium was removed, and the cells were fixed with 2.5% paraformaldehyde  
424 for 20 min. To facilitate counting of migrated cells, cells that did not migrate and remained on  
425 the upper side of membrane (unmigrated cells) were removed with a swab. The membrane was  
426 incubated with Prolong Gold antifade reagent with DAPI. Cells were counted using a Leica  
427 inverted DMI6000B microscope with 63x oil immersion objective. The transmigration was  
428 determined by numbers of migrated infected cells in 5 fields normalized to number of uninfected  
429 cells. Each transmigration assay was carried out in technical triplicate in  $n=3$ .

430  
431 ***In vivo* migration assay.** DCs were plated in 6-well plates ( $1 \times 10^6$  cells/well) and allowed to  
432 adhere overnight. DCs were infected with *Toxoplasma* for 1 h (MOI: 3) and then washed with  
433 RPMI to remove extracellular parasites. After 18 h, infected DCs were incubated with  
434 CellTracker™ Orange CMTMR (Thermo Fisher) as described [33]. Infected DCs were  
435 intraperitoneally inoculated into 6-weeks-old female C57BL/6J mice whose spleens and brains  
436 were subsequently harvested at the indicated time points and the DC migration to the spleen was  
437 measured by the fluorescence intensity at the indicated time points using a Synergy (BioTek)  
438 plate reader at ex/em 541/565 nm (**Fig. S5C**). Also, DNA was isolated from the spleen and brain  
439 using TRIzol (Thermo Fisher), and the number of parasites was determined by using a PCR-  
440 based method measuring levels of the parasite-specific gene region B1 as previously described

441 [34]. After 3 days, the mice were observed twice a day and percent survival was recorded at each  
442 time point. The mice experiment, including parasite measurement by B1 were performed on  
443 blinded. The mice used in this study were housed in American Association for Accreditation of  
444 Laboratory Animal Care (AAALAC)-approved facilities at the Indiana University School of  
445 Medicine Laboratory Animal Research Center (LARC). The Institutional Animal Care and Use  
446 Committee (IACUC) at Indiana University School of Medicine approved the use of all animals  
447 and procedures (IACUC protocol number 11376).

448

449 **Quantification and statistical analysis.** Quantitative data were presented as the mean and  
450 standard deviation and were derived from three biological replicates. Statistical significance was  
451 determined using One-way ANOVA with Tukey's post hoc test and multiple t-test two-tailed  
452 using Graph Prism software. The number of biological replicates (n) and p-values are indicated  
453 in figure legends. For immunoblot analyses, the reported images are representative of at least  
454 three independent experiments. The mice survival curve was analyzed by Gehan-Breslow-  
455 Wilcoxon test for *in vivo* analysis.

456 **Acknowledgments**

457 This research was supported by a research grant from National Institutes of Health (AI124723 to  
458 W.J.S. and R.C.W.). R.C.W. receives financial support from HiberCell. M.H.K. and N.S.A. were  
459 supported by funds from the Brown Center for Immunotherapy. J.M. was supported by PHS  
460 grant T32 AI060519 and the Joseph and Lucille Madri Family Scholarship. The authors would  
461 like to thank Drs. Tatiana Clemente and Stacey Gilk, as well as our lab members for helpful  
462 discussions.

463

464 **Contributions**

465 Study design and planning: L.A., J.M., P.H.A., M.H.K, R.C.W. and W.J.S. Performed  
466 experiments and generated reagents: L.A., J.M., P.H.A. and N.S.A. Data analysis: L.A., J.M. and  
467 P.H.A. Manuscript writing: L.A., R.C.W. and W.J.S. Manuscript was drafted with input from all  
468 authors.

469

470 **Competing interests**

471 The authors declare no competing interests.

## 472 **References**

- 473 1. Hakimi, M.A. et al. (2017) Toxoplasma Effectors Targeting Host Signaling and  
474 Transcription. *Clin Microbiol Rev* 30 (3), 615-645.
- 475 2. Jeffers, V. et al. (2018) A latent ability to persist: differentiation in *Toxoplasma gondii*.  
476 *Cell Mol Life Sci* 75 (13), 2355-2373.
- 477 3. Blader, I.J. and Koshy, A.A. (2014) *Toxoplasma gondii* development of its replicative  
478 niche: in its host cell and beyond. *Eukaryot Cell* 13 (8), 965-76.
- 479 4. Sinai, A.P. et al. (1997) Association of host cell endoplasmic reticulum and mitochondria  
480 with the *Toxoplasma gondii* parasitophorous vacuole membrane: a high affinity interaction. *J*  
481 *Cell Sci* 110 ( Pt 17), 2117-28.
- 482 5. Coppens, I. and Romano, J.D. (2018) Hostile intruder: *Toxoplasma* holds host organelles  
483 captive. *PLoS Pathog* 14 (3), e1006893.
- 484 6. Walter, P. and Ron, D. (2011) The unfolded protein response: from stress pathway to  
485 homeostatic regulation. *Science* 334 (6059), 1081-6.
- 486 7. Karagoz, G.E. et al. (2019) The Unfolded Protein Response: Detecting and Responding  
487 to Fluctuations in the Protein-Folding Capacity of the Endoplasmic Reticulum. *Cold Spring Harb*  
488 *Perspect Biol* 11 (9).
- 489 8. Hetz, C. and Papa, F.R. (2018) The Unfolded Protein Response and Cell Fate Control.  
490 *Mol Cell* 69 (2), 169-181.
- 491 9. Mori, K. (2010) Divest yourself of a preconceived idea: transcription factor ATF6 is not a  
492 soluble protein! *Mol Biol Cell* 21 (9), 1435-8.
- 493 10. Wek, R.C. (2018) Role of eIF2alpha Kinases in Translational Control and Adaptation to  
494 Cellular Stress. *Cold Spring Harb Perspect Biol* 10 (7).

- 495 11. Chang, T.K. et al. (2018) Coordination between Two Branches of the Unfolded Protein  
496 Response Determines Apoptotic Cell Fate. *Mol Cell* 71 (4), 629-636 e5.
- 497 12. Urrea, H. et al. (2018) IRE1alpha governs cytoskeleton remodelling and cell migration  
498 through a direct interaction with filamin A. *Nat Cell Biol* 20 (8), 942-953.
- 499 13. Bierly, A.L. et al. (2008) Dendritic cells expressing plasmacytoid marker PDCA-1 are  
500 Trojan horses during *Toxoplasma gondii* infection. *J Immunol* 181 (12), 8485-91.
- 501 14. Korennykh, A.V. et al. (2009) The unfolded protein response signals through high-order  
502 assembly of Ire1. *Nature* 457 (7230), 687-93.
- 503 15. Aragon, T. et al. (2009) Messenger RNA targeting to endoplasmic reticulum stress  
504 signalling sites. *Nature* 457 (7230), 736-40.
- 505 16. Li, H. et al. (2010) Mammalian endoplasmic reticulum stress sensor IRE1 signals by  
506 dynamic clustering. *Proc Natl Acad Sci U S A* 107 (37), 16113-8.
- 507 17. Carreras-Sureda, A. et al. (2018) Calcium signaling at the endoplasmic reticulum: fine-  
508 tuning stress responses. *Cell Calcium* 70, 24-31.
- 509 18. Carreras-Sureda, A. et al. (2019) Non-canonical function of IRE1alpha determines  
510 mitochondria-associated endoplasmic reticulum composition to control calcium transfer and  
511 bioenergetics. *Nat Cell Biol* 21 (6), 755-767.
- 512 19. Yamamoto, W.R. et al. (2019) Endoplasmic reticulum stress alters ryanodine receptor  
513 function in the murine pancreatic beta cell. *J Biol Chem* 294 (1), 168-181.
- 514 20. Weidner, J.M. et al. (2013) Rapid cytoskeleton remodelling in dendritic cells following  
515 invasion by *Toxoplasma gondii* coincides with the onset of a hypermigratory phenotype. *Cell*  
516 *Microbiol* 15 (10), 1735-52.



- 517 21. Zhou, A.X. et al. (2010) Filamins in cell signaling, transcription and organ development.  
518 Trends Cell Biol 20 (2), 113-23.
- 519 22. Drewry, L.L. and Sibley, L.D. (2019) The hitchhiker's guide to parasite dissemination.  
520 Cell Microbiol, e13070.
- 521 23. Olafsson, E.B. et al. (2019) TIMP-1 promotes hypermigration of Toxoplasma-infected  
522 primary dendritic cells via CD63-ITGB1-FAK signaling. J Cell Sci 132 (3).
- 523 24. Bhandage, A.K. et al. (2019) Toxoplasma-Induced Hypermigration of Primary Cortical  
524 Microglia Implicates GABAergic Signaling. Front Cell Infect Microbiol 9, 73.
- 525 25. Bhandage, A.K. and Barragan, A. (2019) Calling in the CaValry-Toxoplasma gondii  
526 Hijacks GABAergic Signaling and Voltage-Dependent Calcium Channel Signaling for Trojan  
527 horse-Mediated Dissemination. Front Cell Infect Microbiol 9, 61.
- 528 26. Sangare, L.O. et al. (2019) In Vivo CRISPR Screen Identifies TgWIP as a Toxoplasma  
529 Modulator of Dendritic Cell Migration. Cell Host Microbe 26 (4), 478-492.e8.
- 530 27. Jiang, H.Y. et al. (2004) Activating transcription factor 3 is integral to the eukaryotic  
531 initiation factor 2 kinase stress response. Mol Cell Biol 24 (3), 1365-77.
- 532 28. Cong, L. et al. (2013) Multiplex genome engineering using CRISPR/Cas systems.  
533 Science 339 (6121), 819-23.
- 534 29. Inaba, K. et al. (2001) Isolation of dendritic cells. Curr Protoc Immunol Chapter 3, Unit  
535 3.7.
- 536 30. Teske, B.F. et al. (2011) The eIF2 kinase PERK and the integrated stress response  
537 facilitate activation of ATF6 during endoplasmic reticulum stress. Mol Biol Cell 22 (22), 4390-  
538 405.

- 539 31. Borges-Pereira, L. et al. (2015) Calcium Signaling throughout the *Toxoplasma gondii*  
540 Lytic Cycle: A STUDY USING GENETICALLY ENCODED CALCIUM INDICATORS. *J*  
541 *Biol Chem* 290 (45), 26914-26.
- 542 32. Lechuga, S. et al. (2019) Adducins inhibit lung cancer cell migration through  
543 mechanisms involving regulation of cell-matrix adhesion and cadherin-11 expression. *Biochim*  
544 *Biophys Acta Mol Cell Res* 1866 (3), 395-408.
- 545 33. Lambert, H. et al. (2006) Induction of dendritic cell migration upon *Toxoplasma gondii*  
546 infection potentiates parasite dissemination. *Cell Microbiol* 8 (10), 1611-23.
- 547 34. Kompalic-Cristo, A. et al. (2007) Evaluation of a real-time PCR assay based on the  
548 repetitive B1 gene for the detection of *Toxoplasma gondii* in human peripheral blood. *Parasitol*  
549 *Res* 101 (3), 619-25.
- 550
- 551

## 552 **Figure Legends**

553 **Figure 1. *Toxoplasma* infection triggers activation of the UPR in host cells.** (A) At the  
554 indicated times following infection with *Toxoplasma*, cells were harvested and the levels of total  
555 PERK, PERK-P, full length ATF6 and ATF6-N, XBP1s, and GAPDH were measured by  
556 immunoblot analyses. (B) *IRE1*<sup>-/-</sup> MEF cells were transfected with a plasmid encoding EGFP-  
557 IRE1 (green), followed by infection with *Toxoplasma*. DAPI (blue) was used to visualize host  
558 cell and parasites nuclei. Two boxed areas (1 and 2) of each condition are amplified to highlight  
559 the IRE1 distribution. Bar=5 μm. (C) MEF cells were infected with *Toxoplasma* for 18 h, or  
560 were mock infected, and the mRNA levels of the indicated ERAD/chaperone genes were  
561 measured by RT-qPCR. Levels of mRNA were normalized to mock infected, which is  
562 represented as a value of 1. (±SD, n=3) \*\*\*p<0.001, \*\*\*\*p<0.0001. (D) *XBP1s* mRNA levels  
563 were measured by RT-qPCR at the indicated hpi in WT, *PERK*<sup>-/-</sup> and *IRE1*<sup>-/-</sup> MEF cells, as  
564 indicated. Levels of *XBP1s* mRNA were normalized to total *XBP1* mRNA in mock infected cells  
565 (value of 1) at each time point. (±SD, n=3) \*\*\*\*p<0.0001.

566  
567 **Figure 2. *Toxoplasma* infection induces calcium release.** (A) At the indicated time hpi,  
568 cytosolic calcium levels were measured in the infected WT and *IRE1*<sup>-/-</sup> cells. Values of infected  
569 cells were normalized to mock-infected cells (±SD, n=3), \*\*p<0.005 and \*\*\*\*p<0.001. (B)  
570 Infected WT and *IRE1*<sup>-/-</sup> cells were treated with RyR or IP<sub>3</sub>R inhibitors for 6 h and the levels of  
571 cytosolic calcium were measured. 100 μM Ryanodine (RyR inhibitor) and 0.6 μM Xestospongin  
572 C (XeC) (IP<sub>3</sub>R inhibitor), (±SD, n=3) \*\*p<0.05, \*\*\*p<0.005. Infected cells were incubated with  
573 Mag-Fluo-4, followed by plasma membrane permeabilization with saponin and incubation with  
574 ATP to maintain the calcium in the ER. To estimate RyR (C) and IP<sub>3</sub>R (D) activity, WT and

575 *IRE1*<sup>-/-</sup> cells infected with *Toxoplasma* for 18 h were treated with caffeine or IP<sub>3</sub> at the indicated  
576 concentrations and calcium release is represented the fluorescence using Mag-Fluo-4 as  
577 described [19]. Values are represented as the percentage of calcium release and the respective  
578 start points were normalized to untreated WT and *IRE1*<sup>-/-</sup> cells, respectively. (±SD, n=3),  
579 \*\*p<0.05, \*\*\*\*p<0.001.

580  
581 **Figure 3. Activation of IRE1 enhances migration of cells infected with *Toxoplasma*.** (A) The  
582 numbers of lamellipodia were determined in 50 randomly selected MEF cells infected with  
583 *Toxoplasma* 18 hpi and normalized to uninfected cells. Also shown are infected WT cells treated  
584 with 1.2 μM PERKi (GSK2656157), 0.4 μM 4μ8c, 250 nM KIRA6, or 0.2 μM ceapin-A7 for 18  
585 h. (±SD, n=5) \*\*p<0.05, \*\*\*p<0.005. (B) WT and *IRE1*<sup>-/-</sup> cells were infected with *Toxoplasma*  
586 for 18 h, then cells were harvested and the levels of filamin A phosphorylation (S2152) were  
587 measured by immunoblot analyses. (C) WT cells transiently expressing Myc-filamin A were  
588 infected with *Toxoplasma* for 18 h. IP of the tagged Filamin A was carried out using Myc  
589 magnetic beads. Bound proteins were separated by SDS-PAGE and the levels of Myc-filamin A  
590 and associated IRE1 were measured by immunoblot and compared to uninfected cells.  
591 Densitometry of IRE1 signal divided by Myc signal (IRE1/Myc). (D) WT or *IRE1*<sup>-/-</sup>, *PERK*<sup>-/-</sup>,  
592 and *XBPI*<sup>-/-</sup> cells were infected with *Toxoplasma* for 18 h. Alternatively, WT cells were infected  
593 with parasite and treated with the following inhibitors during migration per 18 h: 1.2 μM PERKi  
594 (GSK2656157), 0.2 μM Ceapin-A7, 250 nM KIRA6, or 0.4 μM 4μ8c. Infected and mock  
595 infected cells were trypsinized, counted, and the same number of cells was used for the  
596 transmigration assay. Transmigration was determined by counting the number of infected  
597 normalized to noninfected cells that migrated through the membrane. (±SD n=3), \*\*\* p<0.0005.

598 (E) *IRE1*<sup>-/-</sup> cells were rescued with *ire1-wt* (wild-type), *kD* (kinase domain-dead- K599A), *eD*  
599 (endoribonuclease domain-dead- P830L), *oD* (oligomerization domain-dead- D123P) or *Δ965*  
600 (truncated c-terminal *Δ965*), and then a transmigration assay was carried out as described above.  
601 ( $\pm$ SD, n=3), \*\*\*\*p<0.0001. (F) Transmigration assay of infected WT MEF cells was carried out  
602 in the presence of IP<sub>3</sub>R and RyR inhibitors (0.6  $\mu$ M Xestospongine C, XeC or 100  $\mu$ M  
603 Ryanodine, Ry) or activators (100  $\mu$ M IP<sub>3</sub> or 1 mM caffeine). ( $\pm$ SD, n=3), \*p<0.1, \*\*p<0.05 and  
604 \*\*\*p<0.0005. ns = not significant.

605  
606 **Figure. 4. IRE1 is important for migration of infected DCs.** (A) Bone marrow-derived DCs  
607 were infected with *Toxoplasma* for 18 h and *XBP1s* mRNA levels were measured by RT-qPCR.  
608 The values of *XBP1s* were normalized to values of total *XBP1*. ( $\pm$ SD, n=3) \*\*\*p<0.0005. (B-C)  
609 The CRISPR/Cas9-engineered depletion of IRE1 in DCs, designated *ire* (-), was assayed by RT-  
610 qPCR and immunoblot using IRE1 antibody compared to WT cells (GAPDH was included as a  
611 loading control). (D) Percentage of infection was determined by counting the number of parasites  
612 inside 100 WT or *ire1* (-) cells. (E) WT and *ire1* (-) cells were infected for 18 h and the  
613 transmigration assay was carried out for 6 h. Transmigration was determined by counting the  
614 number of infected cells normalized to noninfected cells. ( $\pm$ SD, n=3), \*\*p<0.05 and  
615 \*\*\*p<0.0005. (F) WT-DCs were infected for 18 h and the transmigration assay was carried out  
616 in presence of 0.6  $\mu$ M xestospongine C (XeC) for 6 h ( $\pm$ SD, n=3), \*\*\*p<0.001. (G-H) J774.1  
617 macrophages were transfected with sgRNA-2 and the depletion of IRE1 was assayed by RT-  
618 qPCR and immunoblot as described in (C). (I) At 18 hpi, WT or *ire1* (-) J774.1 macrophages  
619 were assayed for transmigration as described above. ( $\pm$ SD, n=3), \*\*p<0.05.

620

621 **Figure. 5. IRE1 facilitates migration of infected DCs *in vivo*.** (A-B) IRE1 was depleted in  
622 bone marrow-derived DCs by CRISPR/Cas9 and loss of *IRE1* expression was assayed by RT-  
623 qPCR and immunoblot analyses. (C) WT or *ire1* (-) DCs were infected for 18 h and the  
624 percentage of infection was determined by counting the number of parasites in 100 cells. (D)  
625 Infected WT and *ire1* (-) cells were inoculated into mice by i.p. injection ( $10^6$  infected cells). At  
626 the indicated hpi, the spleen of each mouse was harvested, and the number of parasites was  
627 determined by PCR. \*\*\* $p < 0.005$  and \*\*\*\* $p < 0.0001$ . (E) At 3 days post inoculation, the number  
628 of parasites was determined in the brain using PCR. \*\*\*\* $p < 0.0001$ . (F) Survival of C57BL/6  
629 mice challenged with  $10^6$  infected WT or *ire1* (-) DCs. \*\*\* $p < 0.0005$ . Statistical analyses by  
630 Gehan-Breslow-Wilcoxon test. (G) Model for IRE1-direct hypermigration of host cells infected  
631 by *Toxoplasma*. During infection, *Toxoplasma* triggers calcium release from the host ER, which  
632 creates ER stress and induction of the UPR, which results in enhanced IRE1 association with  
633 filamin A. Consequently, the IRE1-filamin A interaction promotes actin remodeling and host cell  
634 migration.

## 635 **Supplemental Figure Legends**

636 **Supplemental Figure. 1.** MEF cells were transfected with Cas9 bound to sgRNA targeted to  
637 IRE1 as described in the methods section; lowered *IRE1* expression resulting from the  
638 CRISPR/Cas9 gene editing was evaluated by (A) RT-qPCR and (B) immunoblot analyses.  
639 GAPDH was included as a loading control for the immunoblot analyses. (C) WT and *IRE1*<sup>-/-</sup>  
640 MEF cells were treated with 1 μM thapsigargin (TG), or no stress agent, for 6 h. Cells were then  
641 harvested and the *XBPIs* mRNA levels were measured by RT-qPCR. The values of *XBPIs*  
642 mRNAs were normalized to values of total *XBPI* transcripts. (±SD, n=3) \*\*\*p<0.0005.

643  
644 **Supplemental Figure. 2.** (A) MEF cells were infected with *Toxoplasma* for 18 h and then were  
645 incubated with calcium indicator Fluo-4. Fluo-4 intensity is shown as a heat map, with yellow  
646 showing the highest Fluo-4 intensity and blue showing the lowest Fluo-4 intensity. (B) WT and  
647 *IRE1*<sup>-/-</sup> cells were transfected with mCherry-ER-KDEL (a marker for the ER) and infected for 18  
648 h with *Toxoplasma*. Cells were then loaded with the low-affinity Ca<sup>2+</sup> indicator Mag-Fluo-4 AM  
649 (green) and the plasma membrane was permeabilized, resulting in Mag-Fluo-4 AM retainment in  
650 the ER. Note that the Mag-Fluo-4 AM (green) co-localizes with mCherry-ER-KDEL (red).

651  
652 **Supplemental Figure. 3.** (A) WT cells were infected with *Toxoplasma* for 18 h, then fixed with  
653 paraformaldehyde and incubated with SAG1 antibody to detect parasites (green); phalloidin  
654 shows actin (red) and DAPI shows nuclei (blue). The arrows show lamellipodia at edge of cells.  
655 (B) At 18 hpi, infected and uninfected cells were trypsinized and counted, and the same number  
656 of cells were used in the transmigration assay. Transmigration was determined by counting the  
657 number of cells that transmigrated through membrane. (±SD, n=3), \*p<0.05, \*\*\*p<0.0005 and

658 \*\*\*\*p<0.0001. ns = not significant. (C) WT and *IRE1*<sup>-/-</sup> MEF cells were infected using ME49  
659 (type II) strain for 18h and transmigration was determined by counting the number of infected  
660 cells normalized to noninfected cells ( $\pm$ SD, n=3), \*\*\*\*p<0.0001. (D) WT and *ire1* (-) DCs were  
661 infected with ME49 strain for 18 h and transmigration was determined by counting the number  
662 of infected cells normalized to noninfected cells for 6 h ( $\pm$ SD, n=3), \*\*\*p<0.0005.

663  
664 **Supplemental Figure. 4.** (A) *IRE1*<sup>-/-</sup> MEF cells were rescued with WT and mutant versions of  
665 transient expression *IRE1* (green), then cells were fixed and stained using KDEL antibody as an  
666 ER marker (red); DAPI was used as to visualize nuclei (blue). *Ire1-wt*, *ire1-kD*: kinase domain  
667 dead, *ire1-eD*: endoribonuclease dead, *ire1-oD*: *ire1-Δ965* deletion of filamin A binding site  
668 [12]. (B) Lysates were prepared from the cells and IRE1, GFP, or actin protein levels were  
669 measured by immunoblot analyses using specific antibodies. (C) WT or *IRE1*<sup>-/-</sup> MEF cells that  
670 were rescued with the indicated *IRE1* alleles were cultured in the presence or absence of 1  $\mu$ M  
671 thapsigargin for 6 h and *XBPIs* mRNA levels were measured by RT-qPCR. Values of *XBPIs*  
672 mRNA were normalized to total *XBPI* mRNA levels for each condition. ( $\pm$ SD, n=3),  
673 \*\*\*p<0.0005.

674  
675 **Supplemental Figure. 5.** (A) Schematic of IRE1-sgRNAs (1 and 2) and the gene region that was  
676 amplified by RT-qPCR to verify loss of *IRE1* expression. (B) Viability assay of DCs at  
677 designated hours post-transfection with gRNA-IRE1 (*ire1* (-)) or random gRNA (WT). (C)  
678 Infected WT and *ire1* (-) DCs were incubated with cell tracker and then inoculated into mice by  
679 i.p. injection using 10<sup>6</sup> infected cells. At the indicated hpi, the spleen of each mouse was



680 harvested and the cell tracker fluorescence was measured using a plate reader. Values of  
681 fluorescence were normalized to uninfected (fold change). \*\* $p < 0.01$  and \*\*\*\* $p < 0.0001$ .  
682

Fig.1

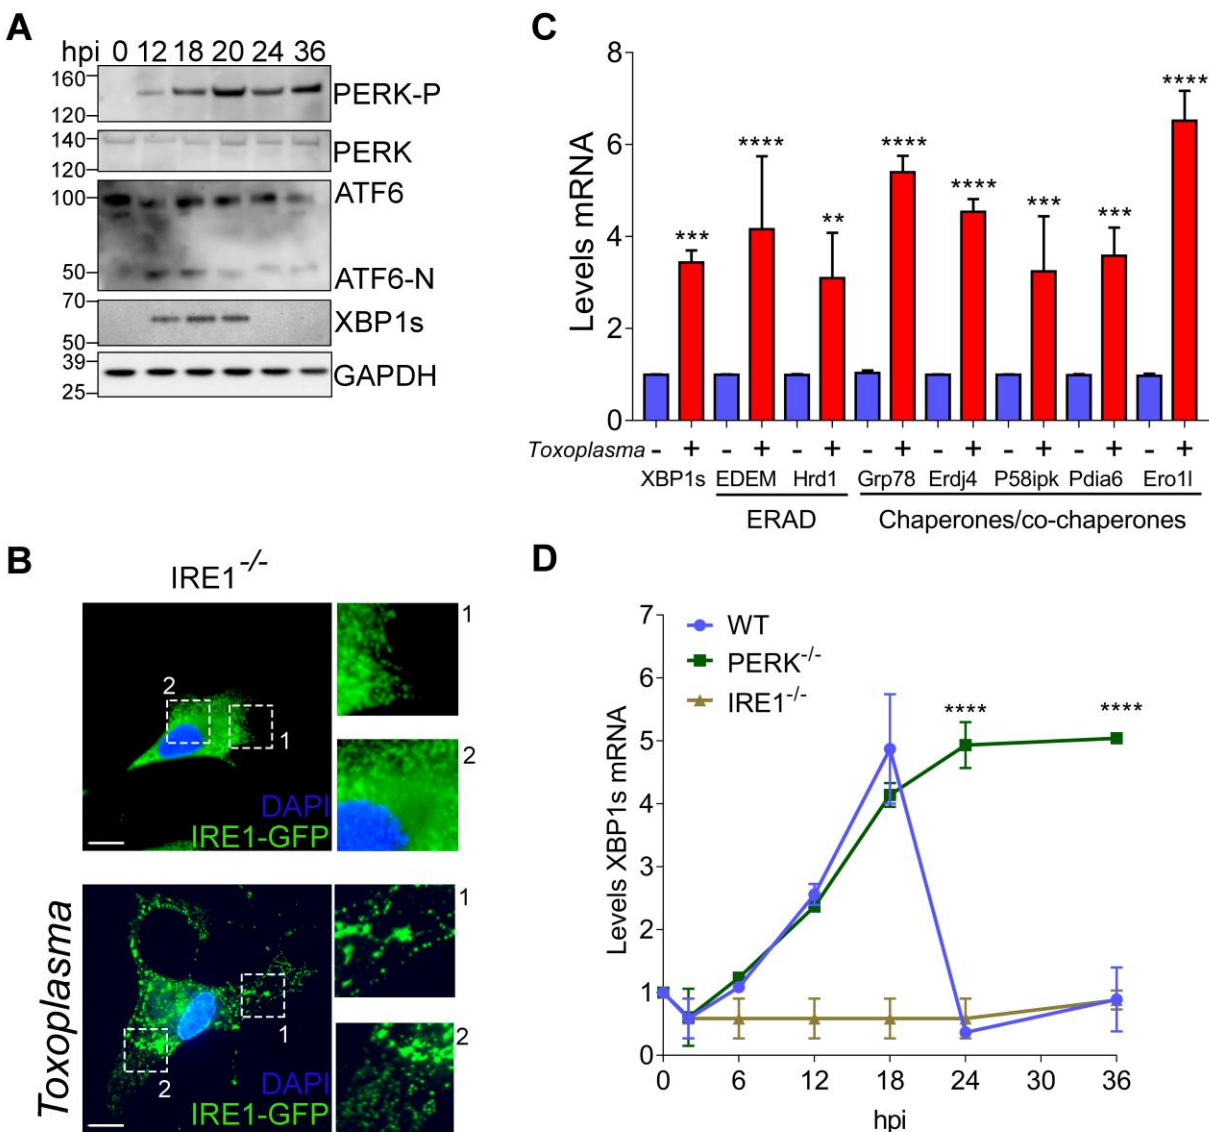

683

684 **Figure. 1. *Toxoplasma* infection triggers activation of the UPR in host cells.** (A) At the  
 685 indicated times following infection with *Toxoplasma*, cells were harvested and the levels of total  
 686 PERK, PERK-P, full length ATF6 and ATF6-N, XBP1s, and GAPDH were measured by  
 687 immunoblot analyses. (B) *IRE1*<sup>-/-</sup> MEF cells were transfected with a plasmid encoding EGFP-  
 688 IRE1 (green), followed by infection with *Toxoplasma*. DAPI (blue) was used to visualize host  
 689 cell and parasites nuclei. Two boxed areas (1 and 2) of each condition are amplified to highlight

690 the IRE1 distribution. Bar=5  $\mu$ m. (C) MEF cells were infected with *Toxoplasma* for 18 h, or  
691 were mock infected, and the mRNA levels of the indicated ERAD/chaperone genes were  
692 measured by RT-qPCR. Levels of mRNA were normalized to mock infected, which is  
693 represented as a value of 1. ( $\pm$ SD, n=3) \*\*\*p<0.001, \*\*\*\*p<0.0001. (D) *XBPIs* mRNA levels  
694 were measured by RT-qPCR at the indicated hpi in WT, *PERK*<sup>-/-</sup> and *IRE1*<sup>-/-</sup> MEF cells, as  
695 indicated. Levels of *XBPIs* mRNA were normalized to total *XBPI* mRNA in mock infected cells  
696 (value of 1) at each time point. ( $\pm$ SD, n=3) \*\*\*\*p<0.0001.

697

698

699

700

701

702

703

704

705

706

707

708

709

710

Fig. 2

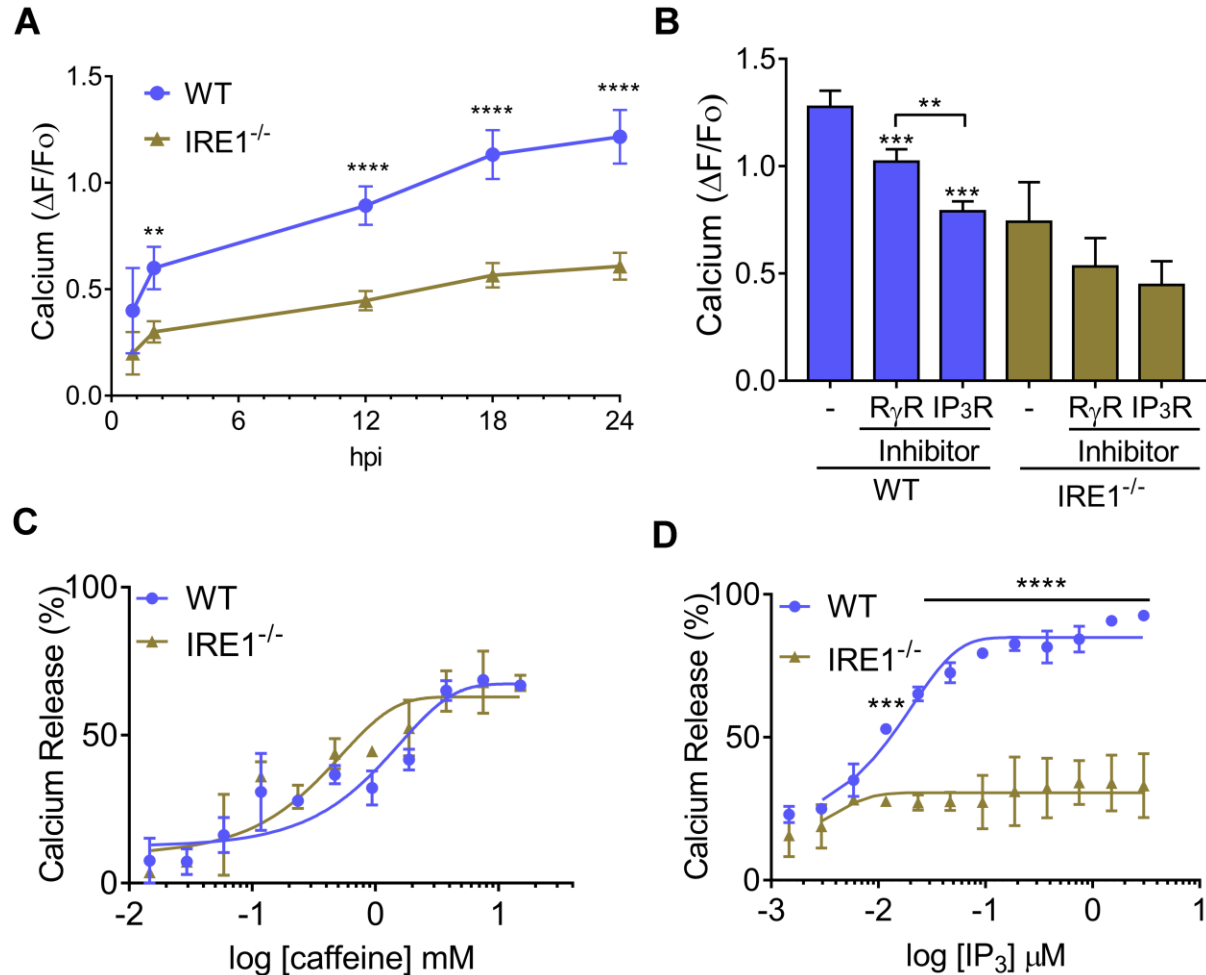

711

712 **Figure 2. Toxoplasma infection induces calcium release.** (A) At the indicated time hpi,

713 cytosolic calcium levels were measured in the infected WT and *IRE1*<sup>-/-</sup> cells. Values of infected

714 cells were normalized to mock-infected cells ( $\pm$ SD, n=3), \*\*p<0.005 and \*\*\*\*p<0.001. (B)

715 Infected WT and *IRE1*<sup>-/-</sup> cells were treated with RyR or IP<sub>3</sub>R inhibitors for 6 h and the levels of

716 cytosolic calcium were measured. 100  $\mu$ M Ryanodine (RyR inhibitor) and 0.6  $\mu$ M Xestospongin

717 C (XeC) (IP<sub>3</sub>R inhibitor), ( $\pm$ SD, n=3) \*\*p<0.05, \*\*\*p<0.005. Infected cells were incubated with

718 Mag-Fluo-4, followed by plasma membrane permeabilization with saponin and incubation with

719 ATP to maintain the calcium in the ER. To estimate RyR (C) and IP<sub>3</sub>R (D) activity, WT and

720 *IREI*<sup>-/-</sup> cells infected with *Toxoplasma* for 18 h were treated with caffeine or IP<sub>3</sub> at the indicated  
721 concentrations and calcium release is represented the fluorescence using Mag-Fluo-4 as  
722 described [19]. Values are represented as the percentage of calcium release and the respective  
723 start points were normalized to untreated WT and *IREI*<sup>-/-</sup> cells, respectively. ( $\pm$ SD, n=3),  
724 \*\*p<0.05, \*\*\*\*p<0.001.

725

726

727

728

729

730

731

732

733

734

735

736

737

738

739

740

741

742

Fig. 3

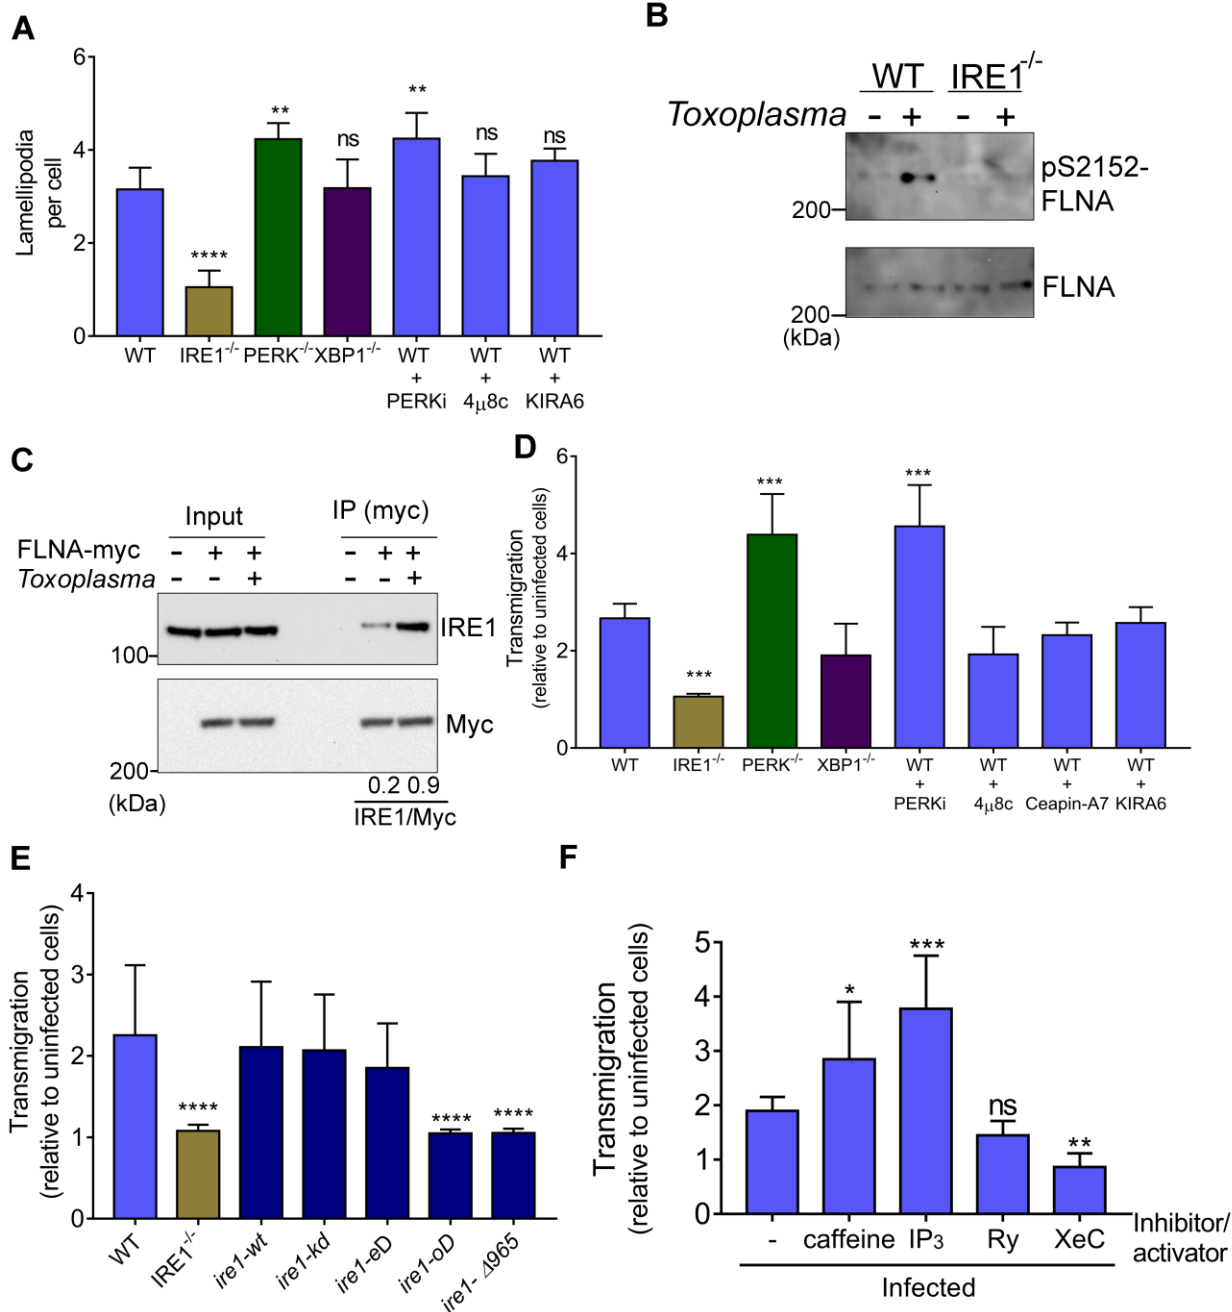

743

744 **Figure 3. Activation of IRE1 enhances migration of cells infected with *Toxoplasma*.** (A) The  
 745 numbers of lamellipodia were determined in 50 randomly selected MEF cells infected with  
 746 *Toxoplasma* 18 hpi and normalized to uninfected cells. Also shown are infected WT cells treated  
 747 with 1.2  $\mu$ M PERKi (GSK2656157), 0.4  $\mu$ M 4 $\mu$ 8c, 250 nM KIRA6, or 0.2  $\mu$ M ceapin-A7 for 18

748 h. ( $\pm$ SD, n=5) \*\*p<0.05, \*\*\*p<0.005. (B) WT and *IRE1*<sup>-/-</sup> cells were infected with *Toxoplasma*  
749 for 18 h, then cells were harvested and the levels of filamin A phosphorylation (S2152) were  
750 measured by immunoblot analyses. (C) WT cells transiently expressing Myc-filamin A were  
751 infected with *Toxoplasma* for 18 h. IP of the tagged Filamin A was carried out using Myc  
752 magnetic beads. Bound proteins were separated by SDS-PAGE and the levels of Myc-filamin A  
753 and associated IRE1 were measured by immunoblot and compared to uninfected cells.  
754 Densitometry of IRE1 signal divided by Myc signal (IRE1/Myc). (D) WT or *IRE1*<sup>-/-</sup>, *PERK*<sup>-/-</sup>,  
755 and *XBPI*<sup>-/-</sup> cells were infected with *Toxoplasma* for 18 h. Alternatively, WT cells were infected  
756 with parasite and treated with the following inhibitors during migration per 18 h: 1.2  $\mu$ M PERKi  
757 (GSK2656157), 0.2  $\mu$ M Ceapin-A7, 250 nM KIRA6, or 0.4  $\mu$ M 4 $\mu$ 8c. Infected and mock  
758 infected cells were trypsinized, counted, and the same number of cells was used for the  
759 transmigration assay. Transmigration was determined by counting the number of infected  
760 normalized to noninfected cells that migrated through the membrane. ( $\pm$ SD n=3), \*\*\* p<0.0005.  
761 (E) *IRE1*<sup>-/-</sup> cells were rescued with *ire1-wt* (wild-type), *kD* (kinase domain-dead- K599A), *eD*  
762 (endoribonuclease domain-dead- P830L), *oD* (oligomerization domain-dead- D123P) or  *$\Delta$ 965*  
763 (truncated c-terminal  *$\Delta$ 965*), and then a transmigration assay was carried out as described above.  
764 ( $\pm$ SD, n=3), \*\*\*\*p<0.0001. (F) Transmigration assay of infected WT MEF cells was carried out  
765 in the presence of IP<sub>3</sub>R and RyR inhibitors (0.6  $\mu$ M Xestospongine C, XeC or 100  $\mu$ M  
766 Ryanodine, Ry) or activators (100  $\mu$ M IP<sub>3</sub> or 1 mM caffeine). ( $\pm$ SD, n=3), \*p<0.1, \*\*p<0.05 and  
767 \*\*\*p<0.0005. ns = not significant.

768

769

770

Fig. 4

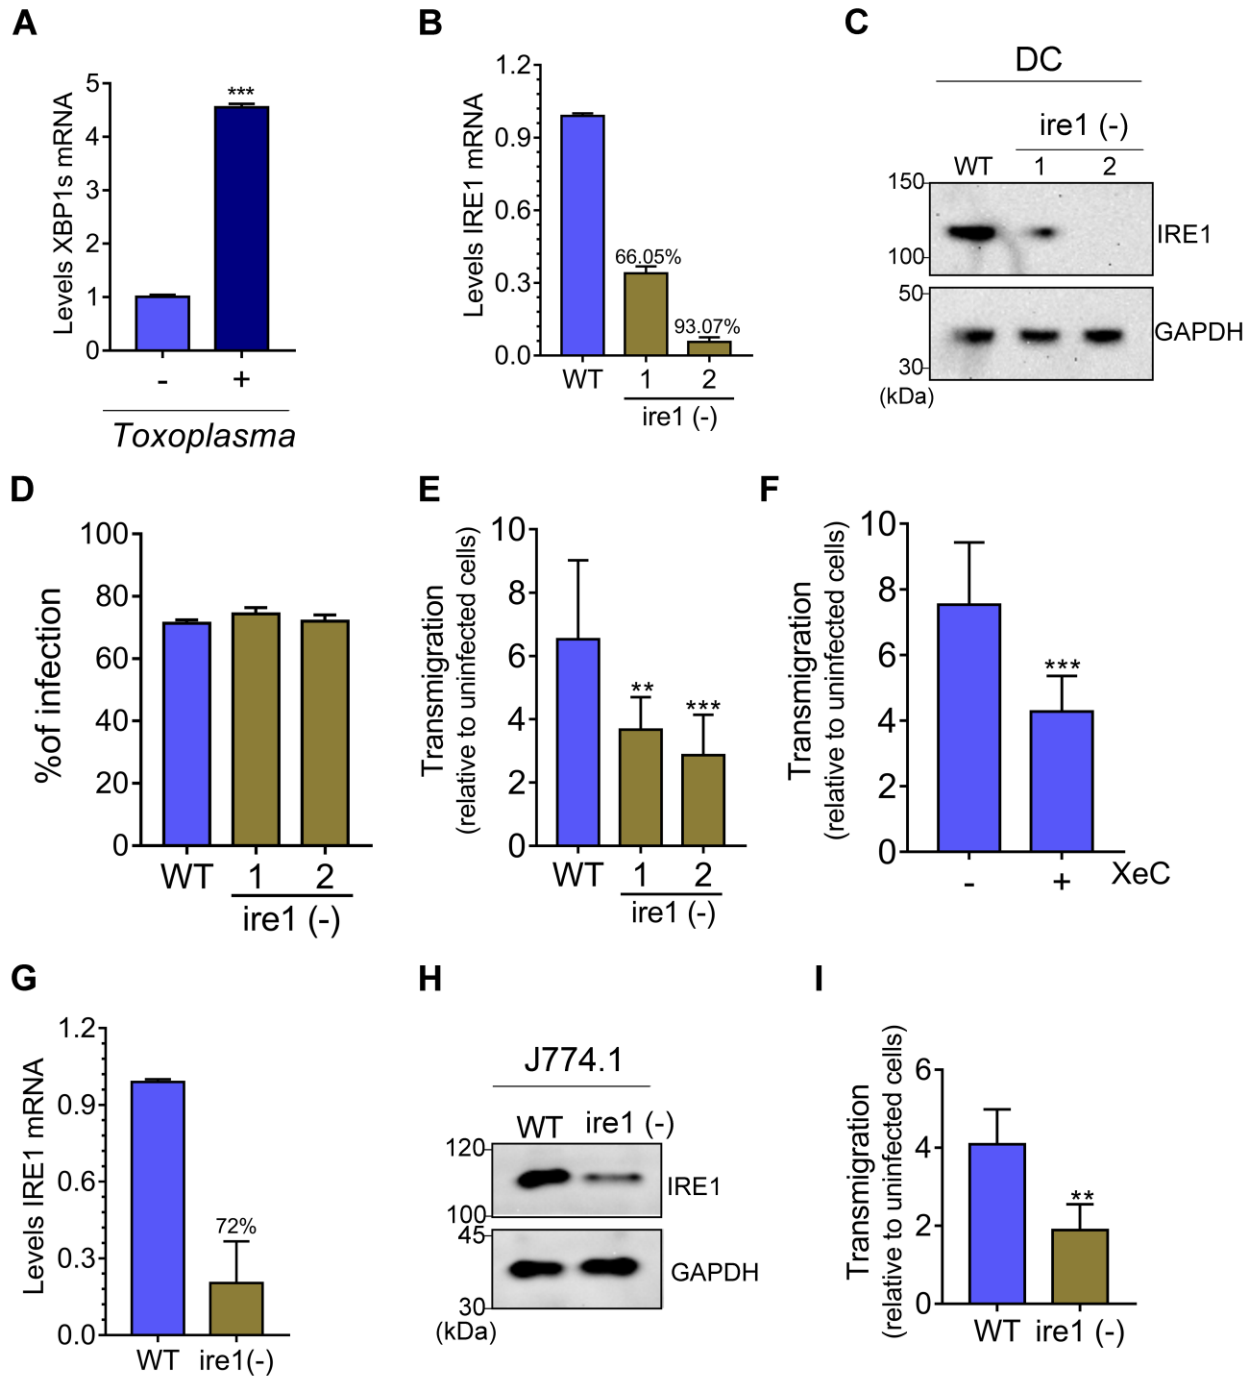

771

772 **Figure 4. IRE1 is important for migration of infected DCs.** (A) Bone marrow-derived DCs

773 were infected with *Toxoplasma* for 18 h and *XBP1s* mRNA levels were measured by RT-qPCR.

774 The values of *XBP1s* were normalized to values of total *XBP1*. ( $\pm$ SD, n=3) \*\*\*p<0.0005. (B-C)



775 The CRISPR/Cas9-engineered depletion of IRE1 in DCs, designated ire (-), was assayed by RT-  
776 qPCR and immunoblot using IRE1 antibody compared to WT cells (GAPDH was included as a  
777 loading control). (D) Percentage of infection was determined by counting the number of parasites  
778 inside 100 WT or ire1 (-) cells. (E) WT and ire1 (-) cells were infected for 18 h and the  
779 transmigration assay was carried out for 6 h. Transmigration was determined by counting the  
780 number of infected cells normalized to noninfected cells. ( $\pm$ SD, n=3), \*\*p<0.05 and  
781 \*\*\*p<0.0005. (F) WT-DCs were infected for 18 h and the transmigration assay was carried out  
782 in presence of 0.6  $\mu$ M xestospongine C (XeC) for 6 h ( $\pm$ SD, n=3), \*\*\*p<0.001. (G-H) J774.1  
783 macrophages were transfected with sgRNA-2 and the depletion of IRE1 was assayed by RT-  
784 qPCR and immunoblot as described in (C). (I) At 18 hpi, WT or ire1 (-) J774.1 macrophages  
785 were assayed for transmigration as described above. ( $\pm$ SD, n=3), \*\*p<0.05.

786

787

788

789

790

791

792

793

794

795

796

797

Fig.5

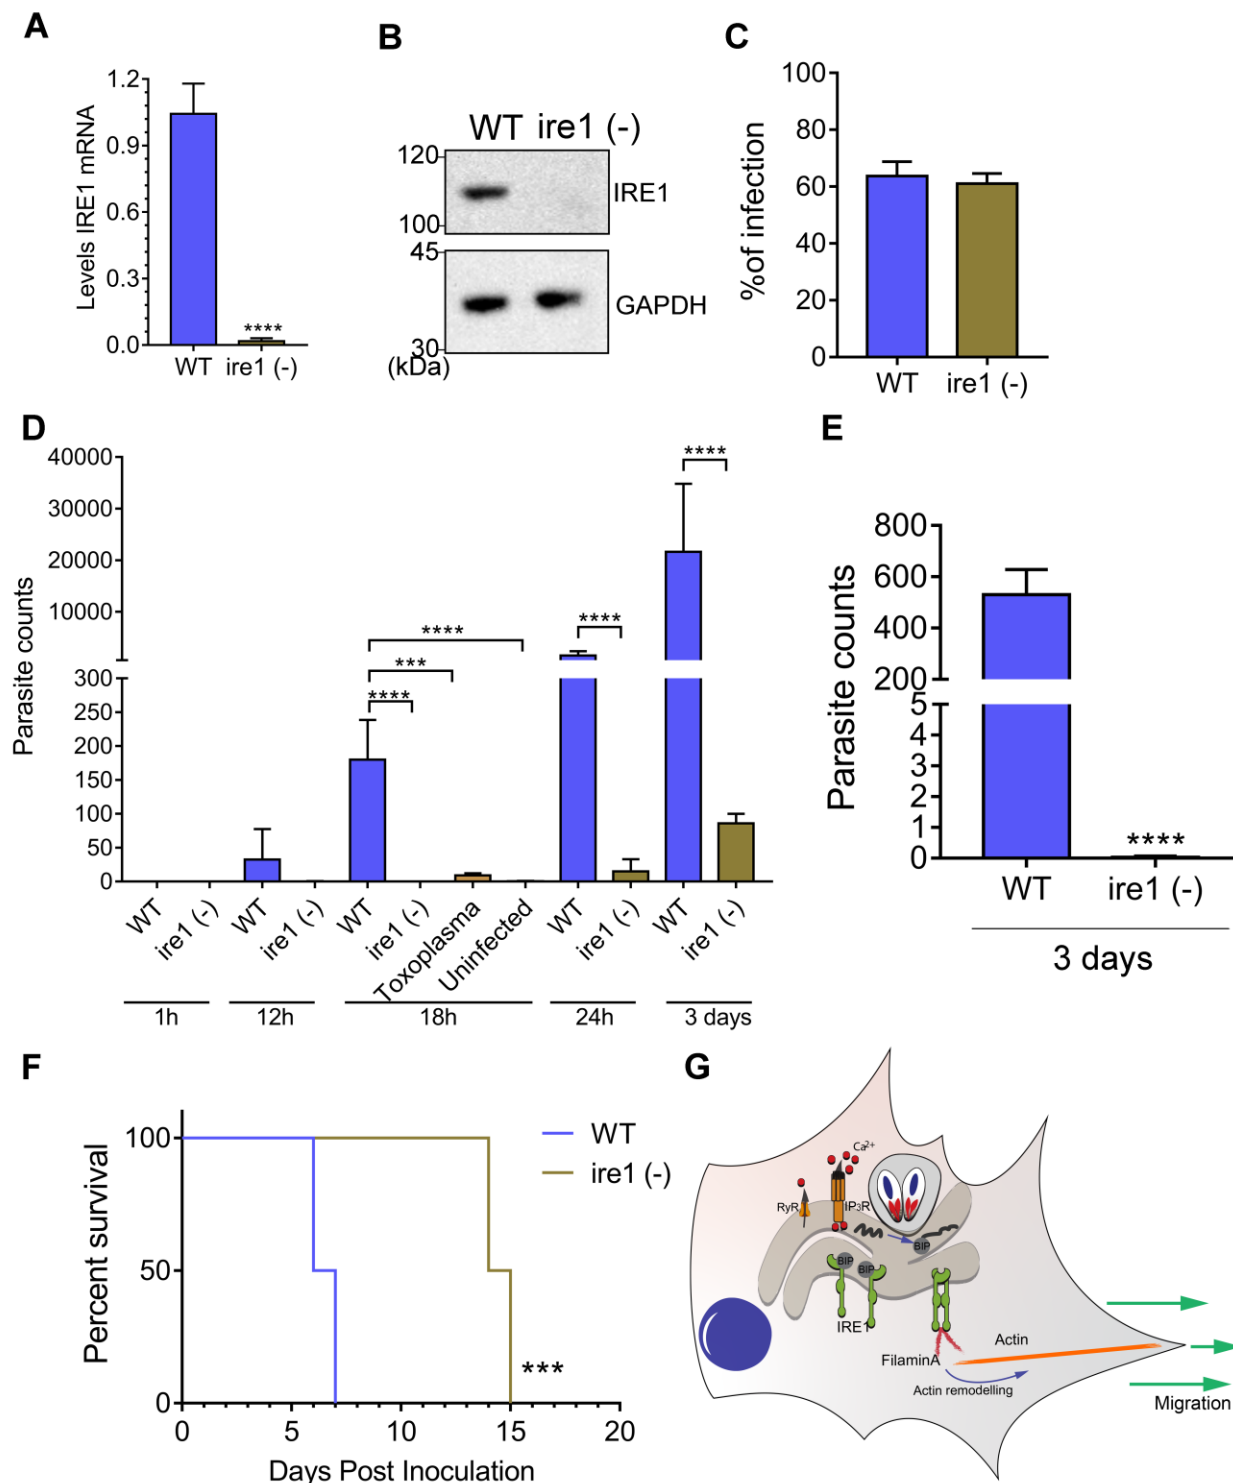

798

799 **Figure 5. IRE1 facilitates migration of infected DCs *in vivo*.** (A-B) IRE1 was depleted in  
800 bone marrow-derived DCs by CRISPR/Cas9 and loss of *IRE1* expression was assayed by RT-

801 qPCR and immunoblot analyses. (C) WT or ire1 (-) DCs were infected for 18 h and the  
802 percentage of infection was determined by counting the number of parasites in 100 cells. (D)  
803 Infected WT and ire1 (-) cells were inoculated into mice by i.p. injection ( $10^6$  infected cells). At  
804 the indicated hpi, the spleen of each mouse was harvested, and the number of parasites was  
805 determined by PCR. \*\*\* $p < 0.005$  and \*\*\*\* $p < 0.0001$ . (E) At 3 days post inoculation, the number  
806 of parasites was determined in the brain using PCR. \*\*\*\* $p < 0.0001$ . (F) Survival of C57BL/6  
807 mice challenged with  $10^6$  infected WT or ire 1 (-) DCs. \*\*\* $p < 0.0005$ . Statistical analyses by  
808 Gehan-Breslow-Wilcoxon test. (G) Model for IRE1-direct hypermigration of host cells infected  
809 by *Toxoplasma*. During infection, *Toxoplasma* triggers calcium release from the host ER, which  
810 creates ER stress and induction of the UPR, which results in enhanced IRE1 association with  
811 filamin A. Consequently, the IRE1-filamin A interaction promotes actin remodeling and host cell  
812 migration.

813

814

815

816

817

818

819

820

821

822

823

## Supplemental Fig. 1

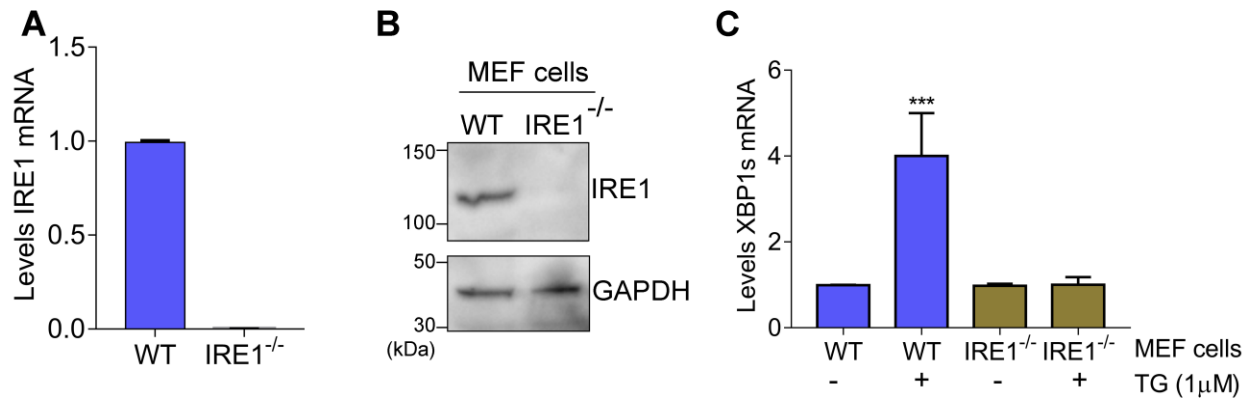

824

825 **Supplemental Figure 1.** MEF cells were transfected with Cas9 bound to sgRNA targeted to

826 IRE1 as described in the methods section; lowered *IRE1* expression resulting from the

827 CRISPR/Cas9 gene editing was evaluated by (A) RT-qPCR and (B) immunoblot analyses.

828 GAPDH was included as a loading control for the immunoblot analyses. (C) WT and *IRE1*<sup>-/-</sup>

829 MEF cells were treated with 1 μM thapsigargin (TG), or no stress agent, for 6 h. Cells were then

830 harvested and the *XBP1s* mRNA levels were measured by RT-qPCR. The values of *XBP1s*

831 mRNAs were normalized to values of total *XBP1* transcripts. (±SD, n=3) \*\*\*p<0.0005.

832

833

834

835

836

837

838

839

Supplemental Fig. 2

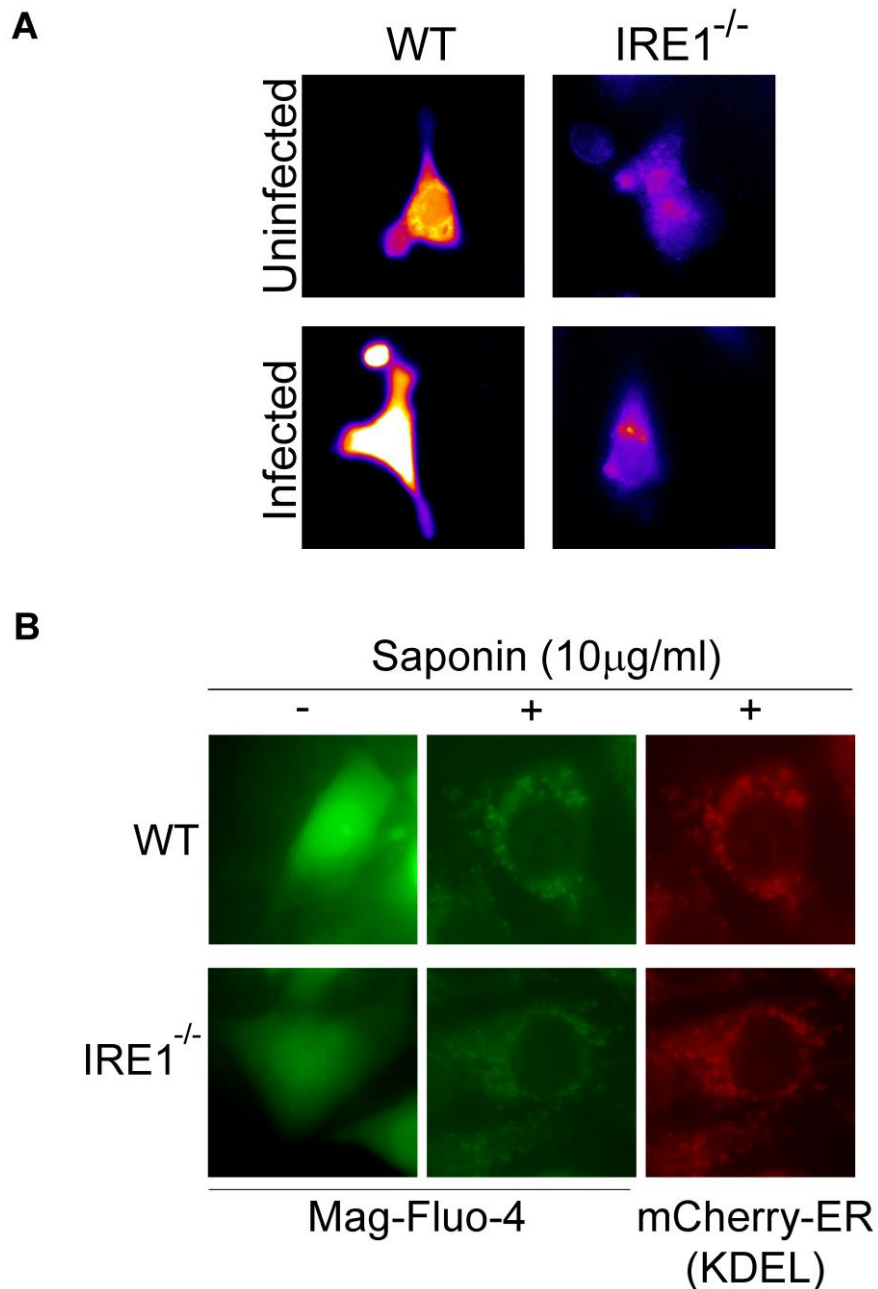

840

841 **Supplemental Figure. 2.** (A) MEF cells were infected with *Toxoplasma* for 18 h and then were  
842 incubated with calcium indicator Fluo-4. Fluo-4 intensity is shown as a heat map, with yellow  
843 showing the highest Fluo-4 intensity and blue showing the lowest Fluo-4 intensity. (B) WT and  
844 *IRE1*<sup>-/-</sup> cells were transfected with mCherry-ER-KDEL (a marker for the ER) and infected for 18

845 h with *Toxoplasma*. Cells were then loaded with the low-affinity Ca<sup>2+</sup> indicator Mag-Fluo-4 AM  
846 (green) and the plasma membrane was permeabilized, resulting in Mag-Fluo-4 AM retainment in  
847 the ER. Note that the Mag-Fluo-4 AM (green) co-localizes with mCherry-ER-KDEL (red).

848

849

850

851

852

853

854

855

856

857

858

859

860

861

862

863

864

865

Supplemental Fig. 3

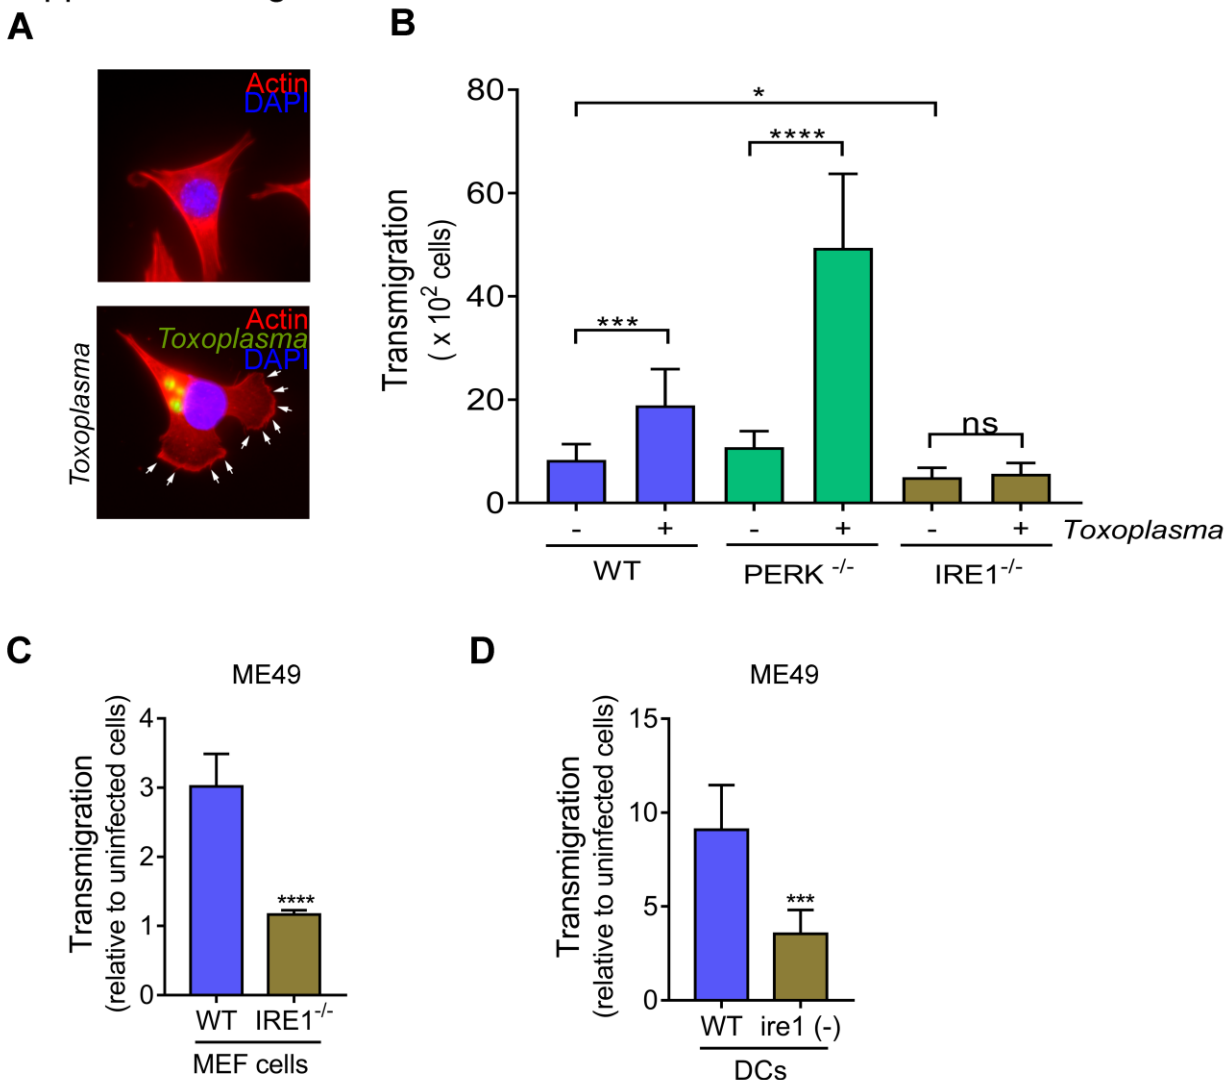

866

867 **Supplemental Figure 3.** (A) WT cells were infected with *Toxoplasma* for 18 h, then fixed with

868 paraformaldehyde and incubated with SAG1 antibody to detect parasites (green); phalloidin

869 shows actin (red) and DAPI shows nuclei (blue). The arrows show lamellipodia at edge of cells.

870 (B) At 18 hpi, infected and uninfected cells were trypsinized and counted, and the same number

871 of cells were used in the transmigration assay. Transmigration was determined by counting the

872 number of cells that transmigrated through membrane. ( $\pm$ SD, n=3), \*p<0.05, \*\*\*p<0.0005 and

873 \*\*\*\*p<0.0001. ns = not significant. (C) WT and IRE1<sup>-/-</sup> MEF cells were infected using ME49

874 (type II) strain for 18h and transmigration was determined by counting the number of infected  
875 cells normalized to noninfected cells ( $\pm$ SD, n=3), \*\*\*\*p<0.0001. (D) WT and ire1 (-) DCs were  
876 infected with ME49 strain for 18 h and transmigration was determined by counting the number  
877 of infected cells normalized to noninfected cells for 6 h ( $\pm$ SD, n=3), \*\*\*p<0.0005.

878

879

880

881

882

883

884

885

886

887

888

889

890

891

892

893

894



## Supplemental Fig. 4

**A**

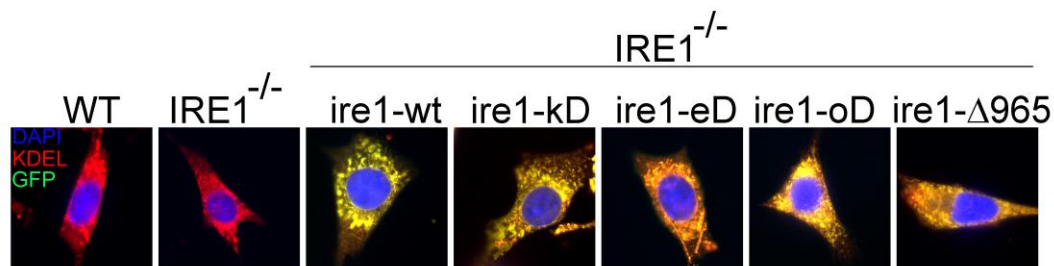

**B**

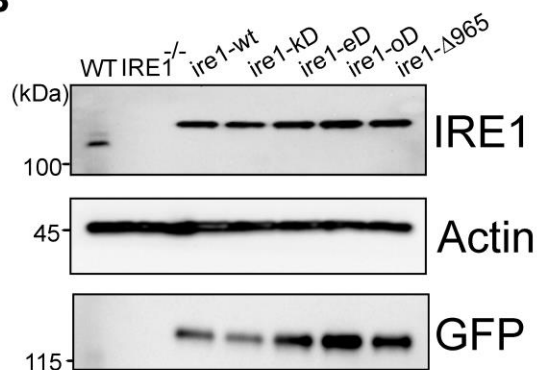

**C**

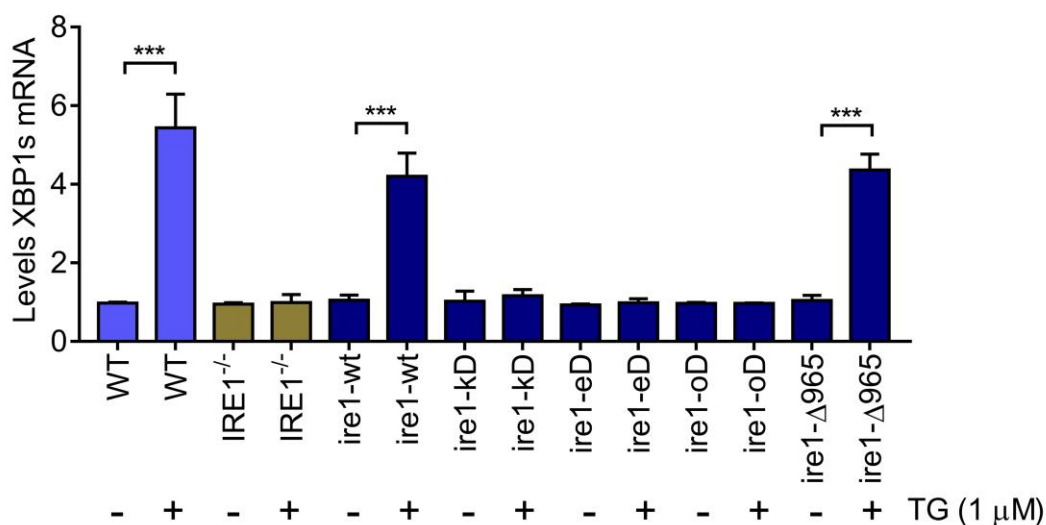

895

896 **Supplemental Figure 4.** (A) *IRE1*<sup>-/-</sup> MEF cells were rescued with WT and mutant versions of  
 897 transient expression *IRE1* (green), then cells were fixed and stained using KDEL antibody as an  
 898 ER marker (red); DAPI was used as to visualize nuclei (blue). *Ire1-wt*, *ire1-kD*: kinase domain  
 899 dead, *ire1-eD*: endoribonuclease dead, *ire1-oD*: *ire1-Δ965* deletion of filamin A binding site

900 [12]. (B) Lysates were prepared from the cells and IRE1, GFP, or actin protein levels were  
901 measured by immunoblot analyses using specific antibodies. (C) WT or *IRE1*<sup>-/-</sup> MEF cells that  
902 were rescued with the indicated *IRE1* alleles were cultured in the presence or absence of 1  $\mu$ M  
903 thapsigargin for 6 h and *XBPIs* mRNA levels were measured by RT-qPCR. Values of *XBPIs*  
904 mRNA were normalized to total *XBPI* mRNA levels for each condition. ( $\pm$ SD, n=3),  
905 \*\*\*p<0.0005.

906

907

908

909

910

911

912

913

914

915

916

917

918

919

920

## Supplemental Fig. 5

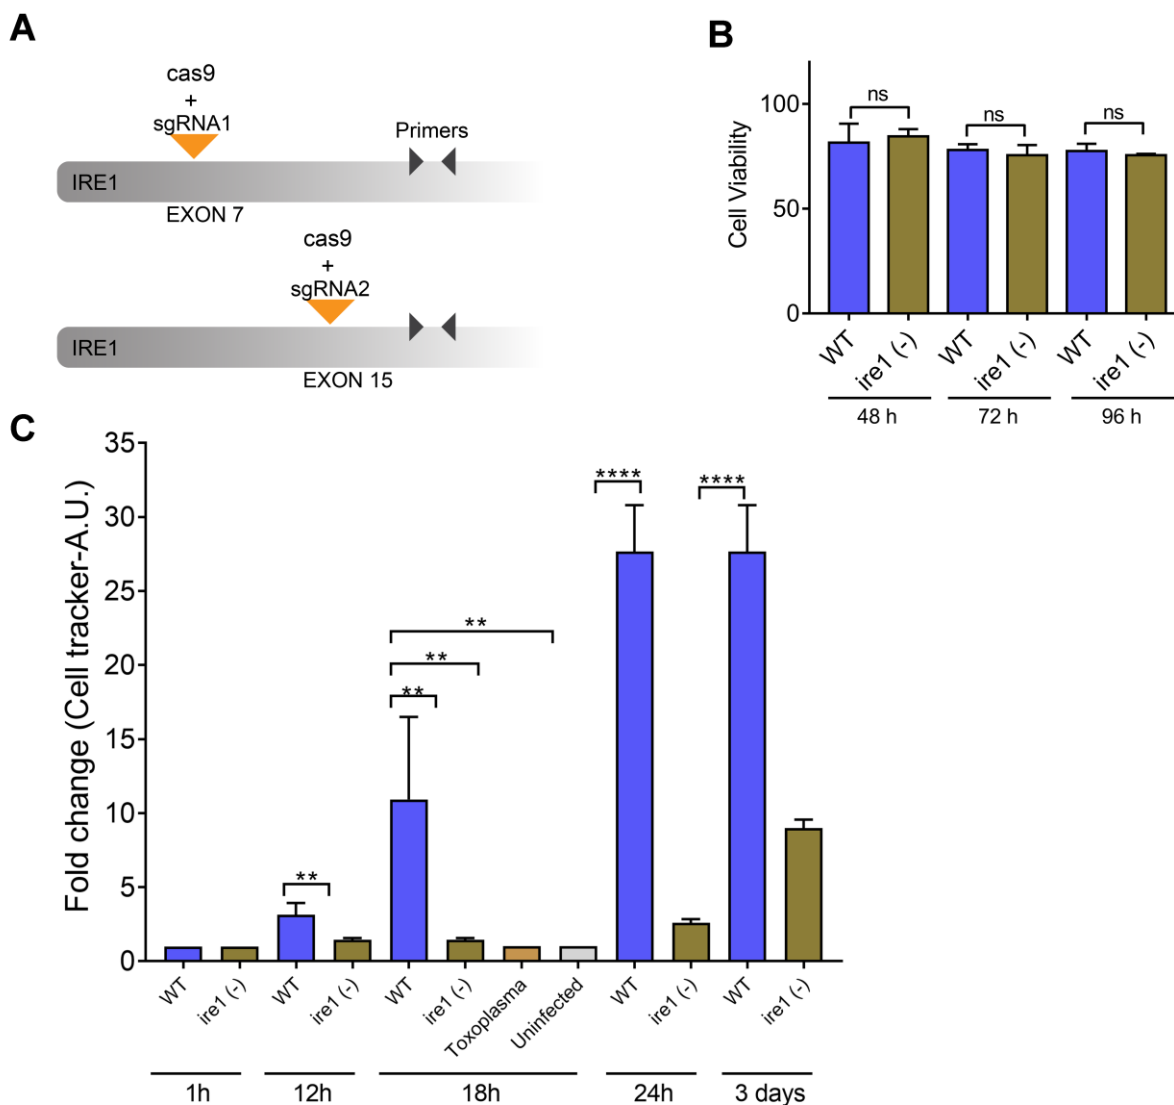

921

922 **Supplemental Figure 5.** (A) Schematic of IRE1-sgRNAs (1 and 2) and the gene region that was

923 amplified by RT-qPCR to verify loss of *IRE1* expression. (B) Viability assay of DCs at

924 designated hours post-transfection with gRNA-IRE1 (*ire1* (-)) or random gRNA (WT). (C)

925 Infected WT and *ire1* (-) DCs were incubated with cell tracker and then inoculated into mice by

926 i.p. injection using  $10^6$  infected cells. At the indicated hpi, the spleen of each mouse was

927 harvested and the cell tracker fluorescence was measured using a plate reader. Values of

928 fluorescence were normalized to uninfected (fold change). \*\* $p < 0.01$  and \*\*\*\* $p < 0.0001$ .

929 **Supplementary Table 1 Oligonucleotide primers used in this study.**

| Primer           | 5'—3'                                       |
|------------------|---------------------------------------------|
| <i>Xbp1-F</i>    | ACATCTTCCCATGGACTCTG                        |
| <i>Xbp1-R</i>    | TAGGTCCTTCTGGGTAGACC                        |
| <i>Xbp1u-F</i>   | GAAGAGAACCACAAACTCCAGC                      |
| <i>Xbp1u-R</i>   | GCAGAGGTGCACATAGTCTGAG                      |
| <i>Xbp1s-F</i>   | GAGTCCGCAGCAGGTG                            |
| <i>Xbp1s-R</i>   | TCCAGAATGCCCAAAGG                           |
| <i>Edem-F</i>    | GGGACCAAGAGGAAAAGTTTG                       |
| <i>Edem-R</i>    | GAGGTGAGCAGGTCAAATCAA                       |
| <i>Hrd1-F</i>    | AGCTACTTCAGTGAACCCCACT                      |
| <i>Hrd1-R</i>    | CTCCTCTACAATGCCCACTGAC                      |
| <i>Grp78-F</i>   | TGTGGTACCCACCAAGAAGTC                       |
| <i>Grp78-R</i>   | TTCAGCTGTCACTCGGAGAAT                       |
| <i>Erdj4-F</i>   | CTTAGGTGTGCCAAAGTCTGC                       |
| <i>Erdj4-R</i>   | GGCATCCGAGAGTGTTCATA                        |
| <i>P58ipk-F</i>  | GTGGCATCCAGATAATTTCCAG                      |
| <i>P58ipk-R</i>  | GAGTTCCAACCTTCTGTGGAAGG                     |
| <i>Pdia6-F</i>   | TGGTTCCTTTCCTACCATCACT                      |
| <i>Pdia6-R</i>   | ACTTTCCTGCTGGAAAACCTGC                      |
| <i>Ero1l-F</i>   | CGGACCAAGTTATGAGTTCCA                       |
| <i>Ero1l-R</i>   | TCAGAGAGATTCTGCCCTTCA                       |
| <i>Ire1-wt-F</i> | TCTAGAACCATGCCGGCCCGGCGGCTGCTGCTGCTGCTGAC   |
| <i>Ire1-wt-R</i> | GAGGGCGTCTGGAGTCACTGGGGGCTGGGGCTCTGGGGGCTCG |
| <i>Ire1-kD-F</i> | GCGACGTGGCCGTGAGGATCCTCCCCGAG               |
| <i>Ire1-kD-R</i> | GGTTGTCAAACATGCCCCGGTACA                    |
| <i>Ire1-eD-F</i> | CTCCGAGCCATGAGAGAAGCACCCTACCGGGAGCTGCC      |

|                    |                                  |
|--------------------|----------------------------------|
| <i>Irel-eD-R</i>   | GAGATCTCTGACAGAACCACCTTTAT       |
| <i>Irel-oD-F</i>   | GGTAAAAAGCAGATCTGGTATGTTATTGACCT |
| <i>Irel-oD-R</i>   | CATGTAGAGGATTCCATCTGAACTTCGGCATG |
| <i>Irel-Δ965-F</i> | TGAGCGAGGGCGGCCCC                |
| <i>Irel-Δ965-R</i> | CAGCTCCCGGTAGTGGTGCTTCTTATTTC    |
| <i>Gapdh-F</i>     | TCACCACCATGGAGAAGGC              |
| <i>Gapdh-R</i>     | GCTAAGCAGTTGGTGGTGCA             |

930

931

932 **Supplementary Table 2 Reagents used in this study.**

| Reagent             | Company names                                                               |
|---------------------|-----------------------------------------------------------------------------|
| <b>Antibody</b>     |                                                                             |
| PERK-P              | Phospho-PERK (Thr980) (16F8) Rabbit mAb #3179- Cell Signaling               |
| PERK                | PERK (C33E10) Rabbit mAb #3192- Cell Signaling                              |
| ATF6                | [30]                                                                        |
| XBP1s               | XBP-1s (D2C1F) Rabbit mAb #12782- Cell Signaling                            |
| GAPDH               | ab9485-Abcam                                                                |
| Phalloidin          | R415-Thermo Fisher Scientific                                               |
| SAG1                | Toxoplasma gondii P30 Monoclonal Antibody (P30/3)- Thermo Fisher Scientific |
| IRE1                | ab37073-Abcam                                                               |
| Myc                 | Myc-Tag (71D10) Rabbit mAb #2278-Cell Signaling                             |
| GFP                 | clone GFP-20-Sigma Aldrich                                                  |
| Filamin A-P (S2152) | Phospho-Filamin A (Ser2152) Antibody #4761-Cell Signaling                   |
| Filamin A           | Filamin A Antibody #4762-Cell Signaling                                     |
| <b>Reagent</b>      |                                                                             |
| Fluo-4, AM          | F14201-Thermo Fisher Scientific                                             |
| Ry                  | 1329-Tocris                                                                 |
| XeC                 | (-)-Xestospongin C- 1280-Tocris                                             |
| IP <sub>3</sub>     | D-myo-Inositol 1,4,5-trisphosphate- 1482-Tocris                             |
| caffeine            | C53-Sigma Sigma Aldrich                                                     |
| Mag-Fluo-4          | M14206- Thermo Fisher Scientific                                            |
| PERKi               | GSK2656157- 5.04651-Sigma Aldrich                                           |
| 4μ8c                | 4479-Tocris                                                                 |
| Ceapin-A7           | SML2330-Sigma Aldrich                                                       |
| KIRA6               | 19151-Cayman Chemical                                                       |

|              |                     |
|--------------|---------------------|
| Collagen I   | A1048301-Gibco      |
| Thapsigargin | 1138-Tocris         |
| DAPI         | D9542-Sigma Aldrich |

933
